# Supplementary material for: Is latent tuberculosis infection challenging in Iranian health care workers? A systematic review and meta-analysis
Source: PubMed Central journal article supplement (PMC6776393; doi:10.1371/journal.pone.0223335), 2019-10-03

# PLOS ONE

## Is latent tuberculosis infection challenging in Iranian health care workers? A systematic review and meta-analysis --Manuscript Draft--

|                                                                                                                                                                                                                                                                                |                                                                                                                                                                                                                                                                                                                                                                                                                                                                                                                                                                                                                                                                                                                                                                                                                                                                                                                                                                                                                                                                                                                                                                                                                                                                                                                                                                                                                                                                                                                                                                                                                                                                                                                                                                                                                                                                            |
|--------------------------------------------------------------------------------------------------------------------------------------------------------------------------------------------------------------------------------------------------------------------------------|----------------------------------------------------------------------------------------------------------------------------------------------------------------------------------------------------------------------------------------------------------------------------------------------------------------------------------------------------------------------------------------------------------------------------------------------------------------------------------------------------------------------------------------------------------------------------------------------------------------------------------------------------------------------------------------------------------------------------------------------------------------------------------------------------------------------------------------------------------------------------------------------------------------------------------------------------------------------------------------------------------------------------------------------------------------------------------------------------------------------------------------------------------------------------------------------------------------------------------------------------------------------------------------------------------------------------------------------------------------------------------------------------------------------------------------------------------------------------------------------------------------------------------------------------------------------------------------------------------------------------------------------------------------------------------------------------------------------------------------------------------------------------------------------------------------------------------------------------------------------------|
| <b>Manuscript Number:</b>                                                                                                                                                                                                                                                      | PONE-D-19-18112                                                                                                                                                                                                                                                                                                                                                                                                                                                                                                                                                                                                                                                                                                                                                                                                                                                                                                                                                                                                                                                                                                                                                                                                                                                                                                                                                                                                                                                                                                                                                                                                                                                                                                                                                                                                                                                            |
| <b>Article Type:</b>                                                                                                                                                                                                                                                           | Research Article                                                                                                                                                                                                                                                                                                                                                                                                                                                                                                                                                                                                                                                                                                                                                                                                                                                                                                                                                                                                                                                                                                                                                                                                                                                                                                                                                                                                                                                                                                                                                                                                                                                                                                                                                                                                                                                           |
| <b>Full Title:</b>                                                                                                                                                                                                                                                             | Is latent tuberculosis infection challenging in Iranian health care workers? A systematic review and meta-analysis                                                                                                                                                                                                                                                                                                                                                                                                                                                                                                                                                                                                                                                                                                                                                                                                                                                                                                                                                                                                                                                                                                                                                                                                                                                                                                                                                                                                                                                                                                                                                                                                                                                                                                                                                         |
| <b>Short Title:</b>                                                                                                                                                                                                                                                            | LT BI among HCWs in Iran                                                                                                                                                                                                                                                                                                                                                                                                                                                                                                                                                                                                                                                                                                                                                                                                                                                                                                                                                                                                                                                                                                                                                                                                                                                                                                                                                                                                                                                                                                                                                                                                                                                                                                                                                                                                                                                   |
| <b>Corresponding Author:</b>                                                                                                                                                                                                                                                   | Alireza Jafari<br>Inflammatory Lung Disease Research Center<br>Rasht, IRAN, ISLAMIC REPUBLIC OF                                                                                                                                                                                                                                                                                                                                                                                                                                                                                                                                                                                                                                                                                                                                                                                                                                                                                                                                                                                                                                                                                                                                                                                                                                                                                                                                                                                                                                                                                                                                                                                                                                                                                                                                                                            |
| <b>Keywords:</b>                                                                                                                                                                                                                                                               | Latent Tuberculosis; Health Personnel; Iran                                                                                                                                                                                                                                                                                                                                                                                                                                                                                                                                                                                                                                                                                                                                                                                                                                                                                                                                                                                                                                                                                                                                                                                                                                                                                                                                                                                                                                                                                                                                                                                                                                                                                                                                                                                                                                |
| <b>Abstract:</b>                                                                                                                                                                                                                                                               | <p><b>Background:</b> Latent tuberculosis infection (LTBI) has been changed to one of the challenges of health care workers (HCWs) in low middle-income countries.</p> <p><b>Method:</b> Search strategies that were lead through Persian (national) databases include SID, Barakat knowledge network system; Irandoc, Magiran; Iranian national library. The international database was Web of science, Scopus, PubMed/MEDLINE, OVID, EMBASE, the Cochrane library, and Google Scholar search engine. The Persian and the English languages were used as the filter in national and international databases, respectively. Searching was done through MeSH terms. The search terms were conducted till January 01, 2019.</p> <p><b>Results:</b> The prevalence of LTBI in Iranian HCWs, based on the PPD test was (27.13% [CI95%: 18.64-37.7]). The highest prevalence of LTBI in HCWs were estimated (41.4 % [CL95%: 25.4-59.5] in the north, and (33.8% [CI95%: 21.1-49.3]) in the west of Iran. The lowest prevalence of LTBI was evaluated (18.2% [CI95%: 3.4-58.2]) in the south of Iran. The prevalence of LTBI in HCWs who had work-experience more than 20 years old were estimated (20.49% [CI95%: 11-34.97]). In the PPD test, the prevalence of LTBI in HCWs who had received the Bacille Calmette–Guérin (BCG) was estimated (15% [CI 95%: 3.6-47.73]). While, in the QFT, the prevalence of LTBI in HCWs in non-vaccinated was estimated (25.71% [CI95%: 13.96-42.49]).</p> <p><b>Conclusions:</b> This meta-analysis shows the highest prevalence of LTBI in HCWs in the north and the west of Iran due to neighboring countries like Azerbaijan and Iraq, respectively. Hence, Iranian HCWs do not fully understand the isolation and personal protection. We also found that BCG was not able to protect Iranian HCWs from TB infections, completely.</p> |
| <b>Order of Authors:</b>                                                                                                                                                                                                                                                       | <p>Mohammad Hossein YektaKooshali</p> <p>Farahnaz Movahedzadeh</p> <p>Ali Alavi Foumani</p> <p>Hoda Sabati</p> <p>Alireza Jafari</p>                                                                                                                                                                                                                                                                                                                                                                                                                                                                                                                                                                                                                                                                                                                                                                                                                                                                                                                                                                                                                                                                                                                                                                                                                                                                                                                                                                                                                                                                                                                                                                                                                                                                                                                                       |
| <b>Additional Information:</b>                                                                                                                                                                                                                                                 |                                                                                                                                                                                                                                                                                                                                                                                                                                                                                                                                                                                                                                                                                                                                                                                                                                                                                                                                                                                                                                                                                                                                                                                                                                                                                                                                                                                                                                                                                                                                                                                                                                                                                                                                                                                                                                                                            |
| <b>Question</b>                                                                                                                                                                                                                                                                | <b>Response</b>                                                                                                                                                                                                                                                                                                                                                                                                                                                                                                                                                                                                                                                                                                                                                                                                                                                                                                                                                                                                                                                                                                                                                                                                                                                                                                                                                                                                                                                                                                                                                                                                                                                                                                                                                                                                                                                            |
| <b>Financial Disclosure</b>                                                                                                                                                                                                                                                    | The author(s) received no specific funding for this work.                                                                                                                                                                                                                                                                                                                                                                                                                                                                                                                                                                                                                                                                                                                                                                                                                                                                                                                                                                                                                                                                                                                                                                                                                                                                                                                                                                                                                                                                                                                                                                                                                                                                                                                                                                                                                  |
| Enter a financial disclosure statement that describes the sources of funding for the work included in this submission. Review the <a href="#">submission guidelines</a> for detailed requirements. View published research articles from <a href="#">PLOS ONE</a> for specific |                                                                                                                                                                                                                                                                                                                                                                                                                                                                                                                                                                                                                                                                                                                                                                                                                                                                                                                                                                                                                                                                                                                                                                                                                                                                                                                                                                                                                                                                                                                                                                                                                                                                                                                                                                                                                                                                            |

examples.

This statement is required for submission and **will appear in the published article** if the submission is accepted. Please make sure it is accurate.

#### Unfunded studies

Enter: *The author(s) received no specific funding for this work.*

#### Funded studies

Enter a statement with the following details:

- Initials of the authors who received each award
- Grant numbers awarded to each author
- The full name of each funder
- URL of each funder website
- Did the sponsors or funders play any role in the study design, data collection and analysis, decision to publish, or preparation of the manuscript?
- **NO** - Include this sentence at the end of your statement: *The funders had no role in study design, data collection and analysis, decision to publish, or preparation of the manuscript.*
- **YES** - Specify the role(s) played.

\* typeset

#### Competing Interests

Use the instructions below to enter a competing interest statement for this submission. On behalf of all authors, disclose any [competing interests](#) that could be perceived to bias this work—acknowledging all financial support and any other relevant financial or non-financial competing interests.

This statement **will appear in the published article** if the submission is accepted. Please make sure it is accurate. View published research articles from [PLOS ONE](#) for specific examples.

The authors have declared that no competing interests exist.

**NO authors have competing interests**

Enter: *The authors have declared that no competing interests exist.*

**Authors with competing interests**

Enter competing interest details beginning with this statement:

*I have read the journal's policy and the authors of this manuscript have the following competing interests: [insert competing interests here]*

\* typeset

**Ethics Statement**

N/A

Enter an ethics statement for this submission. This statement is required if the study involved:

- Human participants
- Human specimens or tissue
- Vertebrate animals or cephalopods
- Vertebrate embryos or tissues
- Field research

Write "N/A" if the submission does not require an ethics statement.

General guidance is provided below. Consult the [submission guidelines](#) for detailed instructions. **Make sure that all information entered here is included in the Methods section of the manuscript.**

**Format for specific study types**

**Human Subject Research (involving human participants and/or tissue)**

- Give the name of the institutional review board or ethics committee that approved the study
- Include the approval number and/or a statement indicating approval of this research
- Indicate the form of consent obtained (written/oral) or the reason that consent was not obtained (e.g. the data were analyzed anonymously)

**Animal Research (involving vertebrate animals, embryos or tissues)**

- Provide the name of the Institutional Animal Care and Use Committee (IACUC) or other relevant ethics board that reviewed the study protocol, and indicate whether they approved this research or granted a formal waiver of ethical approval
- Include an approval number if one was obtained
- If the study involved *non-human primates*, add *additional details* about animal welfare and steps taken to ameliorate suffering
- If anesthesia, euthanasia, or any kind of animal sacrifice is part of the study, include briefly which substances and/or methods were applied

**Field Research**

Include the following details if this study involves the collection of plant, animal, or other materials from a natural setting:

- Field permit number
- Name of the institution or relevant body that granted permission

**Data Availability**

Authors are required to make all data underlying the findings described fully available, without restriction, and from the time of publication. PLOS allows rare exceptions to address legal and ethical concerns. See the [PLOS Data Policy](#) and [FAQ](#) for detailed information.

Yes - all data are fully available without restriction

A Data Availability Statement describing where the data can be found is required at submission. Your answers to this question constitute the Data Availability Statement and **will be published in the article**, if accepted.

**Important:** Stating 'data available on request from the author' is not sufficient. If your data are only available upon request, select 'No' for the first question and explain your exceptional situation in the text box.

Do the authors confirm that all data underlying the findings described in their manuscript are fully available without restriction?

**Describe where the data may be found in full sentences. If you are copying our sample text, replace any instances of XXX with the appropriate details.**

- If the data are **held or will be held in a public repository**, include URLs, accession numbers or DOIs. If this information will only be available after acceptance, indicate this by ticking the box below. For example: *All XXX files are available from the XXX database (accession number(s) XXX, XXX).*
- If the data are all contained **within the manuscript and/or Supporting Information files**, enter the following: *All relevant data are within the manuscript and its Supporting Information files.*
- If neither of these applies but you are able to provide **details of access elsewhere**, with or without limitations, please do so. For example:

*Data cannot be shared publicly because of [XXX]. Data are available from the XXX Institutional Data Access / Ethics Committee (contact via XXX) for researchers who meet the criteria for access to confidential data.*

*The data underlying the results presented in the study are available from (include the name of the third party*

All relevant data are within the manuscript and its Supporting Information files.

*and contact information or URL).*

- This text is appropriate if the data are owned by a third party and authors do not have permission to share the data.

\* typeset

Additional data availability information:

# 1 **Is latent tuberculosis infection challenging in Iranian health care workers?**

## 2 **A systematic review and meta-analysis**

3 **Running title:** LT BI among HCWs in Iran

4 Mohammad Hossein YektaKooshali<sup>1,2</sup>, Farahnaz Movahedzadeh<sup>3,4</sup>, Ali Alavi Foumani<sup>2</sup>,

5 Hoda Sabati<sup>5</sup>, Alireza Jafar<sup>2,6\*</sup>

6 <sup>1</sup> Research Assistant, Student Research Committee, School of nursing, Midwifery and  
7 Paramedicine, Guilan University of Medical Sciences, Rasht, Iran

8 <sup>2</sup> Inflammatory Lung Diseases Research Center, Department of Internal Medicine, Razi  
9 Hospital, School of Medicine, Guilan University of Medical Sciences, Rasht, Iran

10 <sup>3</sup> Institute for Tuberculosis Research, College of Pharmacy, University of Illinois at Chicago,  
11 Chicago, Illinois, USA

12 <sup>4</sup> Department of Medicinal Chemistry and Pharmacognosy, College of Pharmacy University  
13 of Illinois at Chicago, Chicago, Illinois, USA

14 <sup>5</sup> Biotechnology and Biological Science Research Center, Faculty of Science, Shahid  
15 Chamran University of Ahvaz, Iran

16 <sup>6</sup> Urology Research Center, Department of Internal Medicine, Razi Hospital, School of  
17 Medicine, Guilan University of Medical Sciences, Rasht, Iran

18 **Corresponding author:**

19 **Dr. Alireza Jafari**

20 Inflammatory Lung Disease Research Center, Department of Internal Medicine, Razi Hospital,  
21 School of Medicine, Guilan University of Medical Sciences, Rasht, Iran

22 Urology Research Center, Department of Internal Medicine, Razi Hospital, School of Medicine,  
23 Guilan University of Medical Sciences, Rasht, Iran

24 Address: No. 11, Sardar Jangal Road, Razi Hospital, Rasht, Iran

25 Tel: +98 912 346 2738 ; Fax: +98 13 33542460

26 E-mail: Dr.alireza.jafariiii@gmail.com

27 **Abstract:**

28 **Background:** Latent tuberculosis infection (LTBI) has been changed to one of the challenges  
29 of health care workers (HCWs) in low middle-income countries.

30 **Method:** Search strategies that were lead through Persian national databases include  
31 SID, Barakat knowledge network system; Irandoc, Magiran; Iranian national library. The  
32 international database was Web of science, Scopus, PubMed/MEDLINE, OVID, EMBASE,  
33 the Cochrane library, and Google Scholar search engine. The Persian and the English  
34 languages were used as the filter in national and international databases, respectively.  
35 Searching was done through MeSH terms. The search terms were conducted till January 01,  
36 2019.

37 **Results:** The prevalence of LTBI in Iranian HCWs, based on the PPD test was (27.13%  
38 [CI95%: 18.64-37.7]). The highest prevalence of LTBI in HCWs were estimated (41.4 %  
39 [CI95%: 25.4-59.5] in the north, and (33.8% [CI95%: 21.1-49.3] in the west of Iran. The  
40 lowest prevalence of LTBI was evaluated (18.2% [CI95%: 3.4-58.2]) in the south of Iran.  
41 The prevalence of LTBI in HCWs who had work-experience more than 20 years old were  
42 estimated (20.49% [CI95%: 11-34.97]). In the PPD test, the prevalence of LTBI in HCWs  
43 who had received the Bacille Calmette–Guérin (BCG) was estimated (15% [CI 95%: 3.6-  
44 47.73]). While, in the QFT, the prevalence of LTBI in HCWs in non-vaccinated was  
45 estimated (25.71% [CI95%: 13.96-42.49]).

46 **Conclusions:** This meta-analysis shows the highest prevalence of LTBI in HCWs in the north  
47 and the west of Iran due to neighboring countries like Azerbaijan and Iraq, respectively.  
48 Hence, Iranian HCWs do not fully understand the isolation and personal protection. We also  
49 found that BCG was not able to protect Iranian HCWs from TB infections, completely.

50

51 **Keywords:** Latent Tuberculosis; Health Personnel; Iran



52 **1. Introduction:**

53 Latent tuberculosis infection (LTBI) is an immune response to *Mycobacterium*  
54 *tuberculosis* (Mtb) antigens without symptoms of active tuberculosis (TB) [1]. Mtb is able to  
55 colonize inside the alveolar macrophages and finally form granuloma. Mtb is ingested by  
56 phagocytosis by resident alveolar macrophages and tissue dendritic cells (DC) [2, 3]. The  
57 immune cells contribute and the pathological mark of TB, the granuloma, is formed. In the  
58 granuloma, macrophages differentiate into epithelial cells or foamy macrophages, or fuse to  
59 form giant cells, and become surrounded by lymphocytes, fibroblasts and extracellular matrix  
60 proteins. In such conditions, the Mtb will be surviving until the granuloma fails due to  
61 immunosuppression [4, 5]. Mtb use the granuloma as they are effective at initial infection  
62 level since they recruit new macrophages to allow the spread of infection between host cells  
63 [6]. At this stage, the LTBI is formed in the patient's body.

64 [7]. There are several reports of LTBI outbreaks in Iran; however, the highest prevalence  
65 of LTBI has been reported to be 82% in Sistan-Baluchistan province [8]. The risk of  
66 tuberculosis in health care workers (HCWs) is estimated to be twice as high in the general  
67 population, in high-income countries, and five times higher than the general population in  
68 countries with a low and middle income [9, 10].

69 In addition, one of the challenges in many countries is the transfer of tuberculosis from  
70 patients admitted to the hospital to HCWs [10]. Most importantly, the transfer of resistant  
71 *Mycobacterium tuberculosis* strains from admitted patients to HCWs has increased the  
72 importance of the subject [11].

73 According to the findings, direct exposure to HCWs in patients with tuberculosis, direct  
74 contact with phlegm specimens and blood products of suspected tuberculosis patients, and  
75 long hours of work in high-risk places increases the risk of tuberculosis infection [12, 13].  
76 This means that direct contact is one of the most important and worrisome factor in the

77 transmission of tuberculosis to HCWs [10-12, 14]. Work experience, age [15], occupational  
78 status [16], the use of personal protective equipment, ventilation, hospital Infection Control  
79 Unit and infection control in isolation rooms can affect LTBI outbreaks in HCWs [9-12], T  
80 [17]. To diagnose LTBI, the Mantoux tuberculin skin test (TST) and QuantiFERON-TB Gold  
81 (QFT) are used [18]. Studies have shown that QFT has a higher sensitivity and specificity in  
82 detecting LTBI [19, 20]. However, some researchers believe that QFT is not superior to TST  
83 in detecting LTBI [21-23].

84 The early detection of LTBI in controlling, treating and preventing Mtb is a key element  
85 in patients. So that preventive treatment can reduce the risk of active tuberculosis in patients  
86 by up to 90% [24]. So far, systematic review and meta-analysis has not been conducted to  
87 evaluate the prevalence and risk factors of LTBI among HCWs in Iran. In Iran, the Centers  
88 for Disease Control and Prevention (CDC) do not control the Mtb as a regular program,  
89 however, reports of LTBI outbreaks in HCWs attracts a high controversy [25]. Due to the  
90 highest level of evidence and an essential role in evidence-based decision-making of meta-  
91 analysis studies [26, 27], this study estimated the prevalence and risk factors of LTBI among  
92 HCWs in Iran which can have vital information for policy-makers and planning at the  
93 country level.

94

## 95 2. Materials and methods

### 96 2.1. Study Protocol

97 This is the first study that was conducted based on the meta-analysis of observational  
98 studies according to epidemiology guidelines [27], and the PRISMA (Preferred Reporting  
99 Items for Systematic Reviews and Meta-Analyses) statement (S1 File) [28]. The study was  
100 achieved based on five steps; design and search strategy; collecting original articles;  
101 evaluating inclusion and exclusion criteria, and finally qualitative evaluation and statistical  
102 analysis of data. Two independent researchers (MH. YK & A.J.) evaluated the data. The  
103 disagreements were solved by consensus between the team, and a bacteriologist (H.S.E).  
104 The review protocol was registered in PROSPERO (International Prospective Register of  
105 Systematic Reviews) (<https://www.crd.york.ac.uk/PROSPERO/>) Identifier:  
106 CRD42018117682 [29, 30] (S2 File).

### 107 2.2. Search strategy

108 In order to maximize its sensitivity, search strategy was six lead through Persian  
109 (national) databases, including scientific information database  
110 (SID) (<http://www.sid.ir/>), Barakat knowledge network system  
111 (<http://health.barakatkn.com>), Iranian research institute for information science and  
112 technology (IranDoc) (<https://irandoc.ac.ir/>), Magiran (<http://www.magiran.com>), Iranian  
113 national library (<http://www.nlai.ir/>). The international databases, including web of science,  
114 Scopus, PubMed/MEDLINE, OVID, EMBASE, the Cochrane Library (Cochrane Database  
115 of Systematic Reviews), and Google Scholar search engine. The Persian and the English  
116 languages were used as the filter in national and international databases, respectively. The  
117 search terms were adapted to international databases. To search a combination of  
118 words, Boolean operators (AND & OR) were used. Searching was done through medical Search  
119 subject heading (MeSH) terms. The search terms were conducted without any time limitation

120 till January 01, 2019. The authors were then independently analyzed the  
121 manuscript contained in the title and abstract. For instance, PubMed search formula was  
122 provided in the appendix.

### 123 **2.3. Inclusion and exclusion criteria**

#### 124 **2.3.1. Inclusion criteria based on PICO (related to Evidence-Based Medicine) [31, 32]**

125 (1) **P**opulation: This study was been concentrated on the population of HCWs with LTBI  
126 who were residents in the geographic regions of Northern, Southern, Eastern, Western,  
127 center, and capital city of Iran. ;)2( **I**ntervention: The exposure were the laboratory tests  
128 (Interferon-gamma (IFN- $\gamma$ ) release assay (IGRA), and tuberculin skin tests)TST(( of which  
129 confirmed LTBI among HCWs in Iran. ;)3( **C**omparison: A population of HCWs who did  
130 not have signs of active TB disease and did not feel illness.; (4) **O**utcome: Estimate the  
131 overall prevalence and risk factors of LTBI infection among HCWs in Iran.

#### 132 **2.3.2. Exclusion criteria**

133 Review articles, letters, editorial, case reports, conference papers, and comments were  
134 excluded. The studies of which did not have a focus on the prevalence of LTBI in Iranian  
135 HCWs, duplicated papers, non-English full papers, non-Persian full papers, and non-  
136 assessable full-text papers were excluded. Likewise, the populations other than Iranian  
137 HCWs were excluded.

### 138 **2.4. Latent TB detection criteria**

#### 139 **2.4.1. The Mantoux tuberculin skin test (TST)**

140 **T**o the Mantoux tuberculin skin test (TST), purified protein derivative (0.1 MI) is used  
141 [33-35], and the induration at TST site is measured 72 hours later. TST reaction of  $\geq 5$  mm of  
142 induration is classified as negative but is considered as positive in patients receiving  
143 corticosteroid or patients with Acquired Immunodeficiency Syndrome (AIDS), diabetes

144 mellitus, lymphoma, and leukemia. The induration of  $\geq 10$  mm is classified positive in; recent  
145 immigrants ( $< 5$  years) from high-prevalence countries; residents and employees of high-risk  
146 congregate settings; mycobacteriology laboratory personnel; persons with clinical conditions  
147 that place them at high risk. The induration of  $\geq 15$  mm is considered positive in any person,  
148 including persons with no known risk factors for TB. Two-step testing methods were used  
149 for health care workers and nursing home residents [33-35].

#### 150 **2.4.2. Interferon-gamma release assays**

151 Interferon-gamma release assays (IGRAs) show how the immune system reacts to the  
152 Mycobacteria that cause TB [36]. The IGRA has been approved by the U.S. Food and Drug  
153 Administration (FDA). Positive IGRA means that the person has been infected with TB  
154 bacteria. Negative IGRA means that the person's blood did not react to the test and that latent  
155 TB infection or TB disease is not likely. IGRA is the preferred method of TB infection  
156 testing for people who have received the Bacille Calmette–Guérin (BCG) [30, 36-39].

#### 157 **2.5. Selection of studies**

158 During the selection stage, duplicated studies were removed by the EndNote™ software  
159 Ver. X9 (Clarivate Analytics company). In the skimming and screening stage, co-authors,  
160 journals, and publishing years were evaluated by two experts based on inclusion and  
161 exclusion criteria (the eligibility stage), independently. The disagreements between the two  
162 were resolved through an expert bacteriologist (Figure 1).

163 **Fig 1.** A flow diagram (Stacked Venn) following the PRISMA (Depicted by MH-YK).

#### 164 **2.6. Quality appraisal**

165 In this stage, the irrelevant studies were excluded, and then the quality of each study was  
166 evaluated. To quality appraisal, the Newcastle-Ottawa Scale (NOS) checklist (S3 File)[40]  
167 was applied which determined the quality of these studies based on three levels of scoring.

168 The score of five or less defined a poor quality study; the score of five or six distinguished as  
169 the medium quality study, and the score of seven or eight determined as the high-quality  
170 study. Finally, the medium to high-quality studies were included in the data analysis (Fig 1).

171 Fig 1. A flow diagram (Stacked Venn) following the PRISMA (Depicted by MH-YK).

## 172 **2.7. Data extraction**

173 The enter terms were author's names, province, geographical regions, year of publishing,  
174 sample size, age ,gender ,history of BCG ,history of exposure with tuberculosis ,history of  
175 tuberculosis disease ,laboratory diagnosis tests, job experience, duration of employment,  
176 workplaces, single-step or two-step TST, and history of hospitalization. The author's name,  
177 institution, and the journal name were blinded, and then data was extracted through two  
178 researchers (MH.YK & A.J), independently. Only if necessary, the additional  
179 information/raw data was collected by phone call, mailing, or fax.

## 180 **2.8. Statistical analysis**

181 The prevalence of LTBI in HCWs was considered as a binomial distribution probability,  
182 and the variance was calculated by a binomial distribution. To evaluate its heterogeneity,  
183 the Cochran test (Q) and  $I^2$  index were used[1, 41, 42]. The subgroup analysis was  
184 performed based on province, single-step or two-step TST, laboratory diagnosis tests, job,  
185 gender, history of TB disease, history of TB exposure, history of BCG, and geographical  
186 regions. Sensitivity analysis was also achieved to evaluate the impact of each study, based on  
187 the results of the overall prevalence of LTBI in Iranian HCWs. The Begg's test and Egger's  
188 test were carried out using a funnel plot to examine publication bias. Data analysis was  
189 examined by the Comprehensive Meta-Analysis Ver .2) Englewood ,NJ 07631, USA(( ,and  
190 level of significance was considered as  $p < 0.05$ .

191 **3. Results:**

192 **3.1. Study characteristics and methodological quality**

193 In the primary search of study, 421 studies were found. After skimming and screening, 20  
194 (4.75%) studies were eligible according to inclusions and exclusions criteria [43-62]. The  
195 total sample size was calculated 6453 Iranian HCWs (Fig 1) (S1 Table.)

196 **Fig 1.** A flow diagram (Stacked Venn) following the PRISMA (Depicted by MH-YK).

197 **3.2. The overall prevalence LTBI in HCWs**

198 The prevalence of LTBI in HCWs, based on the PPD test (48 hours) was (27.13% [CI95%:  
199 18.64-37.7]) (Fig 2), and based on the QFT test was (16.92% [CI95%: 9.7-27.84]) (Fig 3).

200 The prevalence of LTBI was estimated (12.11% [CI95%: 4.53-28.57]) in Iranian HCWs who  
201 had negative TST reaction (48 hours) in the first week (Fig 4). The prevalence of induration  
202 at TST site (48 h) was estimated <4 mm in (43.74% [CI 95%: 28.19-60.63]), 5-9 mm in  
203 (17.52% [CI 95%: 9.73-29.5]), 10-15 mm in (14.55% [CI 95%: 8.87-22.93]) and >15 mm in  
204 (13.4% [CI 95%: 8.59-20.31]) (S1 Fig).

205 **Fig 2.** The prevalence subgroup analysis (Forest plot - Random effect model) based on  
206 TST/PPD induration diameter (48 hrs.) in HCWs with LTBI.

207 **Fig 3.** The prevalence subgroup analysis (Forest plot - Random effect model) based on QFT  
208 in HCWs with LTBI.

209 **Fig 4.** The prevalence subgroup analysis (Forest plot - Random effect model) based on  
210 TST/PPD induration diameter after one week in HCWs with LTBI.

211 **3.3. The prevalence of LTBI in Iranian HCWs based on geographical region of Iran**

212 The highest prevalence of LTBI in HCWs was estimated (41.4 % [CL95%: 25.4-59.5] in  
213 the north, and (33.8% [CI95%: 21.1-49.3]) in the west of Iran. The lowest prevalence of  
214 LTBI was evaluated (18.2% [CI95%: 3.4-58.2]) in the south of Iran. These results showed a

215 significant relationship between LTBI prevalence in HCWs and the geographic location in  
216 Iran ( $p < 0.0001$ ) (S2 Fig) (Fig 5).

217 **Fig 5.** Distribution of LTBI in Iranian HCWs based on geographical classification (Random  
218 effect model).

### 219 **3.4. Sensitivity analysis and cumulative meta-analysis**

220 Sensitivity analysis of prevalence of LTBI in Iranian HCWs was estimated with a 95%  
221 confidence interval. It showed that there is no significant effect on the overall prevalence of  
222 LTBI in Iranian HCWs (Fig 6). The overall prevalence of LTBI in Iranian HCWs based on  
223 the publication year was estimated by cumulative meta-analysis and represented in (S3 Fig).

224 **Fig 6.** Sensitivity analysis to prevalence of LTBI in Iranian HCWs (one study removed test)

### 225 **3.5. Meta-regression**

226 The prevalence of publishing manuscripts about identification of LTBI in HCWs by the  
227 PPD test (48 hours), has decreased in Iran. There was however no significant relationship.  
228 (Mixed effects regression (Method of moments); Slope =  $-0.1898$  (SE =  $0.068$ , (95% CI: -  
229  $0.323$ –  $-0.056$ )), Intercept =  $381.14$  (SE =  $137.43$ , (95% CI:  $111.78$ – $650.5$ )),  $P = 0.10653$ )  
230 (Fig 7).

231 **Fig 7.** Meta-regression of LTBI in Iranian HCWs according to publishing year of studies  
232 (method of moments).

### 233 **3.6. The prevalence of LTBI in HCWs based on term of employment**

234 The prevalence of LTBI in Iranian HCWs with more than 10 years old work-experience  
235 was evaluated 51%. The prevalence of LTBI in HCWs with less than 10 years old work-  
236 experience was estimated 29.30% in the PPD test. The prevalence of LTBI in HCWs with  
237 more than 20 years old work-experience was calculated (20.49% [CI95%: 11-34.97]), which



238 showed a significant relationship between the term of employment in QFT ( $P < 0.0001$ ) (S4  
239 Fig).

### 240 3.7. The prevalence of LTBI in Iranian HCWs based on occupation and wards

241 The prevalence of LTBI in assistant nurses was estimated 45.76% [CI 95%: 33.51-58.55],  
242 in physicians was evaluated 44.99% [CI95%: 33.37-57.17], in ward nurses was calculated  
243 39.4% [CI95%: 17.63-66.39], and in service workers was estimated 36.43% [CI95%: 19.51-  
244 57.53] based on PPD test. The prevalence of LTBI in both nurses and TB service workers  
245 was higher than other occupations based on QFT (Fig 8).

246 **Fig 8.** The prevalence subgroup analysis of occupational (Forest plot - Random effect  
247 model) based on PPD (A), and QFT (B) in HCWs with LTBI.

248 The prevalence of LTBI in the infectious ward was estimated (52.09% [CI95%: 43.92-  
249 60.14]), and in the internal ward was evaluated (50% [CI95%: 34.22-65.78]. The lowest  
250 prevalence of LTBI was estimated in the infectious wards based on QFT. There was a  
251 significant relationship between the prevalence of LTBI in HCWs, and hospital wards ( $p$   
252  $< 0.0001$ ) (Fig 9).

253 **Fig 9.** The prevalence subgroup analysis of ward (Forest plot - Random effect model) base  
254 on PPD (A), and QFT (B) in HCWs with LTBI.

### 255 3.8. The prevalence of LTBI in HCWs based on gender and age

256 The prevalence of LTBI was estimated at 42.16% [CI95%: 26.41-59.69] in male Iranian  
257 HCWs based on the PPD test. The prevalence of LTBI in Iranian HCWs and type of gender  
258 based on PPD test ( $P < 0.051$ ). In QFT, however, a significant relationship was showed  
259 between the prevalence of LTBI in HCWs, and the gender ( $P < 0.0001$ ) (S5 Fig).

260 The prevalence of LTBI in HCWs who were more than 40 years old was estimated 44% [CI  
261 95%: 26.47-63.16] in the PPD test.

262 The prevalence of LTBI in Iranian HCWs aged 30 years old was estimated 22.52% [CI95  
263 %: 3.7-68.34] in the QFT. In both PPD test and QFT, it was evaluated that there was no  
264 significant relationship between the prevalence of LTBI in HCWs, and age of HCWs (P  
265 <0.0001) (S6 Fig).

### 266 **3.9. The prevalence of LTBI in HCWs based on the history of tuberculosis contact and** 267 **the tuberculosis clinical symptoms**

268 The results showed that 30.15% [CI 95%: 11-60.13] of Iranian HCWs directly contacted  
269 to patients with tuberculosis. The results also showed that 6.9% [CI 95%: 2.36-18.55] of  
270 Iranian HCWs had active tuberculosis symptoms (S7-8 Fig).

### 271 **3.10. The prevalence of LTBI in HCWs based on the “BCG”**

272 The prevalence of LTBI in Iranian HCWs who received the BCG was estimated (15% [CI  
273 95%: 3.6-47.73]) based on the PPD test. While the prevalence of LTBI in Iranian HCWs who  
274 did not receive the BCG was estimated at 25.71% [CI95%: 13.96-42.49] based on the QFT.  
275 In both PPD, and QFT, there was a significant relationship between those who did and those  
276 who did not receive the vaccine (S9 Fig).

### 277 **3.11. Publication bias**

278 The publication bias in this study was evaluated by Begg's and Egger's tests. The  
279 publication bias by Begg's test was calculated 0.06, and the Egger's test was calculated 0.028.  
280 The probability of the publication bias in this study was significant (S10 Fig).

#### 281 4. Discussion:

282 This study is the first systematic review and meta-analysis of latent tuberculosis outbreak  
283 (LTBI) been carried out in health care workers (HCWs) in Iran. According to results of the  
284 current meta-analysis, the prevalence of LTBI in HCWs in Iran is estimated at 27.1% [1].  
285 Among the low- and middle-income countries, the prevalence of LTBI in Kenya [63],  
286 Zimbabwe [64], Russia [65], Brazil [66], Vietnam [67], Rwanda [68], China [69] and South  
287 Africa [70] has been higher than in Iran [1]. The prevalence of LTBI in HCWs Italy [71],  
288 Norway [72] and India [73] is reported to be equal to or less than Iran. Iran is a TB endemic  
289 country [25] and the treatment of latent tuberculosis is usually done by using a single  
290 medicine and only in high risk groups [74]. While in high-income countries, screening of  
291 pulmonary and lab staffs is recommended annually [75]. Also, based on the prevalence of  
292 LTBI in Iranian HCWs, it could be seen that Iranian HCWs training is not sufficient in  
293 confronting a patient with tuberculosis [25]. Hence, Iranian HCWs do not fully understand  
294 isolation and personal protection [25].

295 According to the results of meta-analysis, the lowest prevalence of LTBI in HCWs was in  
296 southern Iran (18.2%). The highest prevalence of LTBI in HCWs was reported in northern  
297 and western Iran. The high prevalence of LTBI in HCWs may be due to neighboring  
298 Azerbaijan and Iraq [76].

299 Azerbaijan which is listed on the high burden countries has high prevalence of multidrug  
300 resistance MTB [76-78]. In fact, the northern neighbors of Iran, such as Kazakhstan,  
301 Azerbaijan, are among the high burden countries with a high prevalence of multi-drug  
302 resistant tuberculosis [80].

303 On the other hands, the name of the country's western neighbor of Iran –Iraq- is not listed on  
304 the high burden countries [76-78] but according to reports from Ministry of Health - Iran  
305 Center for Medical Education and Treatment, Infectious Disease Control Center- the Iraqi

306 state may have become a high-risk source for tuberculosis after undergoing its recent crisis  
307 [79, 80].

308 The current study showed that 15.5% of the HCWs used before the BCG with at least a  
309 positive PPD test. According to studies, BCG does not protect adults from getting infected  
310 with tuberculosis, so the positive results of tuberculin testing in people vaccinated with BCG  
311 will be considered as a latent infection [81]. In other words, previous vaccination with BCG  
312 prevents tuberculin testing [82]. This may be due to a false positive reaction in PPD [25].  
313 Some HCWs may respond to skin tests without being infected with mycobacterium [83]. The  
314 reason for these false-positive reactions may be due to contamination with non-tuberculosis  
315 mycobacterium, previous BCG, poor test performance or inappropriate interpretation of the  
316 test [83].

## 317 5. Limitations

318 Information about this meta-analysis was extracted from data published in Iranian  
319 databases as there was no access to the actual information of the control center of the  
320 Ministry of Health and Medical Education, so the exact prevalence of LTBI in HCWs could  
321 not be calculated.

322 Selection bias is able to limit the generalization of these findings because the type of bacteria  
323 strains in a country could be different with the other countries and could be related to descent  
324 diversities.

325 On the other hands, patients may not respond to skin test tuberculosis, even if they are  
326 infected with *Mycobacterium*. It may be due to skin allergies, recent infections (recent  
327 contact for 8 to 10 weeks), chronic infection, recent vaccinations with live viruses, advanced  
328 tuberculosis, some viral diseases (measles and bile), misdiagnosis skin or incorrect  
329 interpretation of the reaction. Patients may also respond to skin tests, even without being  
330 infected with *Mycobacterium*. The reason for these reactions may be due to contamination

331 with non-tuberculosis *Mycobacterium*, previous BCG, inappropriate test run or inappropriate  
332 interpretation of the test.

333 Despite the fact that the CDC updates the guidelines for the prevention and transmission  
334 of *M. tuberculosis* in health-care settings annually, the protocol for HCWs in Iran has not yet  
335 been prepared. Also, workshops could be developed to train tuberculosis prevention and self-  
336 care HCWs in the western regions of the Iran.

337 National databases are not sensitive to operators “AND” and “OR” to search for the  
338 combinations. Also, some databases were not fully accessible because of using Guilan  
339 University of Medical Sciences’ - Iran Ministry of Health & Medical Education- VPN.

## 340 **6. Conclusion**

341 This meta-analysis showed the prevalence of LTBI in HCWs in Iran and estimated at  
342 27.1%. The prevalence of LTBI in HCWs of Italy, Norway and India is reported to be equal  
343 to or less than HCWs of Iran. On the other hand, the highest prevalence of LTBI in HCWs in  
344 the north and the west of Iran may due to neighboring with Azerbaijan and Iraq which has  
345 become a high-risk source for tuberculosis by overcoming its recent years of crisis.  
346 Meanwhile, HCWs training is not sufficient in confronting a patient with tuberculosis, in  
347 Iran. Hence, Iranian HCWs do not fully understand the isolation and personal protection. We  
348 also found that BCG was not able to protect Iranian HCWs from TB infectious, completely.

## 349 **7. Competing Interests**

350 The authors declare that they have no competing interests.

## 351 **8. Acknowledgment**

352 We would like to thank the vice chancellor of research and technology, Guilan University of  
353 Medical Sciences (ID: IR.GUMS.REC.1397.513).

354 **9. Author Contributions**

355 **Conceptualization:** Alireza Jafari, Mohammad Hossein YektaKooshali

356 **Data curation:** Mohammad Hossein YektaKooshali

357 **Formal analysis:** Mohammad Hossein YektaKooshali

358 **Funding acquisition:** Mohammad Hossein YektaKooshali

359 **Investigation:** Alireza Jafari, Farahnaz Movahedzadeh, Ali Alavi Foumani

360 **Methodology:** Mohammad Hossein YektaKooshali

361 **Project administration:** Alireza Jafari, Mohammad Hossein YektaKooshali

362 **Resources:** Alireza Jafari

363 **Software:** Mohammad Hossein YektaKooshali

364 **Supervision:** Farahnaz Movahedzadeh, Ali Alavi Foumani

365 **Validation:** Mohammad Hossein YektaKooshali

366 **Visualization:** Mohammad Hossein YektaKooshali

367 **Writing ± original draft:** Alireza Jafari, Mohammad Hossein YektaKooshali, Hoda Sabati

368 **Writing ± review & editing:** Mohammad Hossein YektaKooshali, Alireza Jafari, Hoda

369 Sabati

370

371 **10. References**

- 372 1. Apriani L, McAllister S, Sharples K, Alisjahbana B, Ruslami R, Hill PC, et al. Latent tuberculosis  
373 infection in healthcare workers in low- and middle-income countries: an updated systematic review.  
374 *The European respiratory journal*. 2019;53(4). Epub 2019/02/23. doi: 10.1183/13993003.01789-  
375 2018. PubMed PMID: 30792341.
- 376 2. Korbelt DS, Schneider BE, Schaible UE. Innate immunity in tuberculosis: myths and truth.  
377 *Microbes Infect*. 2008;10(9):995-1004. Epub 2008/09/03. doi: 10.1016/j.micinf.2008.07.039.  
378 PubMed PMID: 18762264.
- 379 3. North RJ, Jung YJ. Immunity to tuberculosis. *Annu Rev Immunol*. 2004;22:599-623. Epub  
380 2004/03/23. doi: 10.1146/annurev.immunol.22.012703.104635. PubMed PMID: 15032590.
- 381 4. Russell DG. Who puts the tubercle in tuberculosis? *Nat Rev Microbiol*. 2007;5(1):39-47. Epub  
382 2006/12/13. doi: 10.1038/nrmicro1538. PubMed PMID: 17160001.
- 383 5. De Chastellier C. The many niches and strategies used by pathogenic mycobacteria for  
384 survival within host macrophages. *Immunobiology*. 2009;214(7):526-42.
- 385 6. Davis JM, Ramakrishnan L. The role of the granuloma in expansion and dissemination of  
386 early tuberculous infection. *Cell*. 2009;136(1):37-49. Epub 2009/01/13. doi:  
387 10.1016/j.cell.2008.11.014. PubMed PMID: 19135887; PubMed Central PMCID: PMC3134310.
- 388 7. Houben RM, Dodd PJ. The Global Burden of Latent Tuberculosis Infection: A Re-estimation  
389 Using Mathematical Modelling. *PLoS Med*. 2016;13(10):e1002152. Epub 2016/10/26. doi:  
390 10.1371/journal.pmed.1002152. PubMed PMID: 27780211; PubMed Central PMCID:  
391 PMC35079585.
- 392 8. Azizi F, Hatami H, Janghorbani MJTEP. Epidemiology and control of common diseases in Iran.  
393 2000:602-16.
- 394 9. Joshi R, Reingold AL, Menzies D, Pai MJPm. Tuberculosis among health-care workers in low-  
395 and middle-income countries: a systematic review. 2006;3(12):e494.
- 396 10. Kassim S, Zuber P, Wiktor S, Diomande F, Coulibaly I, Coulibaly D, et al. Tuberculin skin  
397 testing to assess the occupational risk of Mycobacterium tuberculosis infection among health care  
398 workers in Abidjan, Cote d'Ivoire. 2000;4(4):321-6.
- 399 11. Nosocomial TJIIT. Nosocomial tuberculosis in the era of drug resistant tuberculosis.  
400 2009;56:59-61.
- 401 12. Yanai H, Limpakarnjanarat K, Uthavivoravit W, Mastro T, Mori T, Tappero JTIJoT, et al. Risk of  
402 Mycobacterium tuberculosis infection and disease among health care workers, Chiang Rai, Thailand.  
403 2003;7(1):36-45.
- 404 13. Field MJ. The occupational tuberculosis risk of health care workers. *Tuberculosis in the*  
405 *Workplace: National Academies Press (US)*; 2001.
- 406 14. Jasmer RM, Nahid P, Hopewell PCJNEJoM. Latent tuberculosis infection. 2002;347(23):1860-  
407 6.
- 408 15. Christopher DJ, Daley P, Armstrong L, James P, Gupta R, Premkumar B, et al. Tuberculosis  
409 infection among young nursing trainees in South India. 2010;5(4):e10408.
- 410 16. Garber E, San Gabriel P LL, Saiman L. A survey of latent tuberculosis infection among  
411 laboratory healthcare workers in New York City. *Infection Control & Hospital Epidemiology*.  
412 2003;24(11):801-6.
- 413 17. Jo K-W, Hong Y, Park JS, Bae I-G, Eom JS, Lee S-R, et al. Prevalence of latent tuberculosis  
414 infection among health care workers in South Korea: a multicenter study. 2013;75(1):18-24.
- 415 18. Brock I, Weldingh K, Lillebaek T, Follmann F, Andersen P. Comparison of tuberculin skin test  
416 and new specific blood test in tuberculosis contacts. *Am J Respir Crit Care Med*. 2004;170(1):65-9.  
417 Epub 2004/04/17. doi: 10.1164/rccm.200402-232OC. PubMed PMID: 15087297.
- 418 19. Kang YA, Lee HW, Yoon HI, Cho B, Han SK, Shim Y-S, et al. Discrepancy between the  
419 tuberculin skin test and the whole-blood interferon  $\gamma$  assay for the diagnosis of latent tuberculosis  
420 infection in an intermediate tuberculosis-burden country. 2005;293(22):2756-61.

- 421 20. Mori T, Sakatani M, Yamagishi F, Takashima T, Kawabe Y, Nagao K, et al. Specific detection of  
422 tuberculosis infection: an interferon- $\gamma$ -based assay using new antigens. 2004;170(1):59-64.
- 423 21. Bennett JE, Dolin R, Blaser MJ. Mandell, Douglas, and Bennett's Principles and Practice of  
424 Infectious Diseases: 2-Volume Set: Elsevier Health Sciences; 2014.
- 425 22. Menzies DJCID. What does tuberculin reactivity after bacille Calmette-Guérin vaccination tell  
426 us? 2000;31(Supplement\_3):S71-S4.
- 427 23. Menzies R, Vissandjee B. Effect of bacille Calmette-Guerin vaccination on tuberculin  
428 reactivity. Am Rev Respir Dis. 1992;145(3):621-5. Epub 1992/03/01. doi: 10.1164/ajrccm/145.3.621.  
429 PubMed PMID: 1546843.
- 430 24. Gazi MA, Islam MR, Kibria MG, Mahmud ZJEJoCM, Diseases I. General and advanced  
431 diagnostic tools to detect Mycobacterium tuberculosis and their drug susceptibility: a review.  
432 2015;34(5):851-61.
- 433 25. Nasehi M, Hashemi-Shahraki A, Doosti-Irani A, Sharafi S, Mostafavi EJE, health. Prevalence of  
434 latent tuberculosis infection among tuberculosis laboratory workers in Iran. 2017;39.
- 435 26. Liberati A, Taricco MJRiP, Books RMPMF. How to do and report systematic reviews and  
436 meta-analysis. 2010:137-64.
- 437 27. Cook DJ, Mulrow CD, Haynes RB. Systematic reviews: synthesis of best evidence for clinical  
438 decisions. Ann Intern Med. 1997;126(5):376-80. Epub 1997/03/01. PubMed PMID: 9054282.
- 439 28. Moher D, Liberati A, Tetzlaff J, Altman DGJAOim. Preferred reporting items for systematic  
440 reviews and meta-analyses: the PRISMA statement. 2009;151(4):264-9.
- 441 29. Editors PLM. Best practice in systematic reviews: the importance of protocols and  
442 registration. PLoS Med. 2011;8(2):e1001009. Epub 2011/03/03. doi: 10.1371/journal.pmed.1001009.  
443 PubMed PMID: 21364968; PubMed Central PMCID: PMCPMC3042995.
- 444 30. Nasiri MJ, Pormohammad A, Goudarzi H, Mardani M, Zamani S, Migliori GB, et al. Latent  
445 tuberculosis infection in transplant candidates: a systematic review and meta-analysis on TST and  
446 IGRA. Infection. 2019;47(3):353-61. Epub 2019/02/26. doi: 10.1007/s15010-019-01285-7. PubMed  
447 PMID: 30805899.
- 448 31. JafariNezhad A, YektaKooshali MH. Lung cancer in idiopathic pulmonary fibrosis: A  
449 systematic review and meta-analysis. PLoS One. 2018;13(8):e0202360. Epub 2018/08/17. doi:  
450 10.1371/journal.pone.0202360. PubMed PMID: 30114238; PubMed Central PMCID:  
451 PMCPMC6095562.
- 452 32. da Costa Santos CM, de Mattos Pimenta CA, Nobre MR. The PICO strategy for the research  
453 question construction and evidence search. Rev Lat Am Enfermagem. 2007;15(3):508-11. Epub  
454 2007/07/27. PubMed PMID: 17653438; PubMed Central PMCID: PMC17653438.
- 455 33. Krajewski W, Zdrojowy R, Grzegolka J, Krajewski P, Wrobel M, Luczak M, et al. Does Mantoux  
456 Test Result Predicts BCG Immunotherapy Efficiency and Severe ToXxicity in Non-Muscle Invasive  
457 Bladder Cancer. Urology journal. 2018. Epub 2018/11/25. doi: 10.22037/uj.v0i0.4542. PubMed  
458 PMID: 30471076.
- 459 34. Sargin G, Senturk T, Ceylan E, Telli M, Cildag S, Dogan H. TST, QuantiFERON-TB Gold test and  
460 T-SPOT.TB test for detecting latent tuberculosis infection in patients with rheumatic disease prior to  
461 anti-TNF therapy. Tuberkuloz ve toraks. 2018;66(2):136-43. Epub 2018/09/25. doi:  
462 10.5578/tt.66444. PubMed PMID: 30246657.
- 463 35. Wang W, Liu HM, Zhou J, Wang YG, Feng X, Tang H, et al. Skin test of tuberculin purified  
464 protein derivatives with a dissolving microneedle-array patch. Drug delivery and translational  
465 research. 2019. Epub 2019/03/21. doi: 10.1007/s13346-019-00629-y. PubMed PMID: 30891708.
- 466 36. Wigg AJ, Narayana SK, Anwar S, Ramachandran J, Muller K, Chen JW, et al. High rates of  
467 indeterminate interferon-gamma release assays for the diagnosis of latent tuberculosis infection in  
468 liver transplantation candidates. Transplant infectious disease : an official journal of the  
469 Transplantation Society. 2019:e13087. Epub 2019/03/31. doi: 10.1111/tid.13087. PubMed PMID:  
470 30927483.



- 471 37. Barton E, Gao Y, Ball D, Fidler K, Klein N, Curtis N, et al. Calcineurin Inhibitors and Variation in  
472 the Performance of Interferon-gamma Release Assays Used to Detect Tuberculosis Infection. *Annals*  
473 *of the American Thoracic Society*. 2019;16(6):771-5. Epub 2019/02/28. doi:  
474 10.1513/AnnalsATS.201811-784RL. PubMed PMID: 30811214.
- 475 38. Bennet R, Nejat S, Eriksson M. Effective Tuberculosis Contact Investigation Using Interferon-  
476 Gamma Release Assays. *The Pediatric infectious disease journal*. 2019;38(4):e76-e8. Epub  
477 2019/03/19. doi: 10.1097/INF.0000000000002272. PubMed PMID: 30882747.
- 478 39. Igari H, Akutsu N, Ishikawa S, Aoyama H, Otsuki K, Hasegawa M, et al. Positivity rate of  
479 interferon-gamma release assays for estimating the prevalence of latent tuberculosis infection in  
480 renal transplant recipients in Japan. *Journal of infection and chemotherapy : official journal of the*  
481 *Japan Society of Chemotherapy*. 2019. Epub 2019/03/25. doi: 10.1016/j.jiac.2019.02.018. PubMed  
482 PMID: 30905632.
- 483 40. Poorolajal J, Cheraghi Z, Irani AD, Rezaeian S. Quality of Cohort Studies Reporting Post the  
484 Strengthening the Reporting of Observational Studies in Epidemiology (STROBE) Statement.  
485 *Epidemiol Health*. 2011;33:e2011005. Epub 2011/07/01. doi: 10.4178/epih/e2011005. PubMed  
486 PMID: 21716598; PubMed Central PMCID: PMC3110877.
- 487 41. Ades AE, Lu G, Higgins JP. The interpretation of random-effects meta-analysis in decision  
488 models. *Med Decis Making*. 2005;25(6):646-54. Epub 2005/11/12. doi: 10.1177/0272989X05282643.  
489 PubMed PMID: 16282215.
- 490 42. Borenstein M, Hedges LV, Higgins JP, Rothstein HR. A basic introduction to fixed-effect and  
491 random-effects models for meta-analysis. *Res Synth Methods*. 2010;1(2):97-111. Epub 2010/04/01.  
492 doi: 10.1002/jrsm.12. PubMed PMID: 26061376.
- 493 43. Alian S, Dadashi A, Najafi N, Alikhani A, Davoudi A, Moosazadeh M, et al. Evaluation of  
494 Tuberculin Skin Test (TST) in Medical Students in Mazandaran University of Medical Sciences, Sari,  
495 Iran. *Global Journal of Health Science*. 2016;9(5):274.
- 496 44. Besharat M, Abbasi F. Tuberculin Skin Test among 1,424 Healthy Employees in Chaharmahal  
497 Province, Iran. *Tanaffos*. 2011;1(10):37-9.
- 498 45. Davoodi L, Babamahmoodi F, Mirabi A, Mohammad Hosseini E. Evaluation of Tuberculin Skin  
499 Test Seroconversion Among the Staff in Qaemshahr Razi Hospital, 2015-2017. *Journal of*  
500 *Mazandaran University of Medical Sciences*. 2018;28(164):158-63.
- 501 46. Ghafouri M, Seyed Sharifi S. Prevalence of latent tuberculosis infections in Health care  
502 workers (HCW) in Mashhad Hospital. *Journal of North Khorasan University of Medical Sciences*.  
503 2015;6(4):829-40.
- 504 47. Golchin M, Rostami M. Tuberculin test in nursing and human-sciences students. *Journal of*  
505 *Research in Medical Sciences*. 2005;10(3):172-6.
- 506 48. Hashemi SH, Mamani M, Alizadeh N, Nazari M, Sedighi I. Prevalence of tuberculosis infection  
507 among health-care workers in Hamadan, west of Iran. *Avicenna Journal of Clinical Microbiology and*  
508 *Infection*. 2014;1(1):e19214.
- 509 49. Kariminia A, Sharifnia Z, Aghakhani A, Banifazl M, Eslamifar A, Hazrati M, et al. Comparison  
510 of QuantiFERON TB-G-test to TST for detecting latent tuberculosis infection in a high-incidence area  
511 containing BCG-vaccinated population. *Journal of evaluation in clinical practice*. 2009;15(1):148-51.  
512 Epub 2009/02/26. doi: 10.1111/j.1365-2753.2008.00970.x. PubMed PMID: 19239595.
- 513 50. Mostafavi E, Nasehi M, Hashemi Shahraki A, Esmaeili S, Ghaderi E, Sharafi S, et al.  
514 Comparison of the tuberculin skin test and the QuantiFERON-TB Gold test in detecting latent  
515 tuberculosis in health care workers in Iran. *Epidemiol Health*. 2016;38:e2016032. Epub 2016/07/28.  
516 doi: 10.4178/epih.e2016032. PubMed PMID: 27457062; PubMed Central PMCID: PMC3110877.
- 517 51. Nasehi M, Hashemi-Shahraki A, Doosti-Irani A, Sharafi S, Mostafavi E. Prevalence of latent  
518 tuberculosis infection among tuberculosis laboratory workers in Iran. *Epidemiol Health*.  
519 2017;39:e2017002. Epub 2017/01/18. doi: 10.4178/epih.e2017002. PubMed PMID: 28092930;  
520 PubMed Central PMCID: PMC3110877.

- 521 52. Nazer M, Shahivand M, Zare S. The prevalence of latent tuberculosis (TB) infection in  
522 healthcare staff of Khorramabad Ashayer hospital in 2015. *Yafte*. 2015;17(2):23-31.
- 523 53. Nikokar I, Dadgran A, Mafozei L. A comparison of two-step tuberculin skin test between  
524 health-care workers and nonhospital employees. *Iranian Journal of Medical Sciences*.  
525 2015;35(3):201-4.
- 526 54. Rahbar M, Karamyar M, Hajia M. Prevalence and determinant of tuberculin skin test among  
527 health care workers of Imam Khomeini Hospital of Uremia, Iran. *Shiraz E-Medical Journal*.  
528 2007;8(4):162-7.
- 529 55. Salehi M, Mood BS, Metanat M. Positive Tuberculin Skin Test Among Health Care Workers:  
530 Prevalence and Risk Factors in Teaching Hospitals of a Highly Endemic Region for Tuberculosis,  
531 Zahedan, Iran. *International Journal of Infection*. 2016;3(3).
- 532 56. Salmanzadeh S, Abbasissifar H, Alavi SM. Comparison study of QuantiFERON test with  
533 tuberculin skin testing to diagnose latent tuberculosis infection among nurses working in teaching  
534 hospitals of Ahvaz, Iran. *Caspian journal of internal medicine*. 2016;7(2):82-7. Epub 2016/07/08.  
535 PubMed PMID: 27386058; PubMed Central PMCID: PMCPMC4913709.
- 536 57. Sayad B, Zarpeyma A, Janbakhsh A. Tuberculin Skin Test Results in Health Care Workers of  
537 Imam Khomeini Hospital (Kermanshah 2004). *Journal of Kermanshah University of Medical  
538 Sciences(Behbood)*. 2006;10(3):258-67.
- 539 58. Sharafkhani R, Ahmadi N, Salarilak S, Rahimirad M, Khashabi J. prevalence of tuberculosis  
540 infection in health and office workers at Urmia University of Medical Sciences. *Journal of Urmia  
541 University of Medical Sciences*. 2011;22(2):119-22.
- 542 59. Taheri M, Bazrafkan H, Habibagahi M. Determining the Latent Tuberculosis Infection by IFN -  
543 gamma Elispot Assay in Healthcare Workers From University Hospitals of Shiraz, South West of Iran.  
544 *Iranian Red Crescent medical journal*. 2013;15(6):477-82. Epub 2013/12/19. doi:  
545 10.5812/ircmj.3635. PubMed PMID: 24349745; PubMed Central PMCID: PMCPMC3840834.
- 546 60. Talebi-Taher M, Javad-Moosavi SA, Entezari AH, Shekarabi M, Parhizkar B. Comparing the  
547 performance of QuantiFERON-TB Gold and Mantoux test in detecting latent tuberculosis infection  
548 among Iranian health care workers. *Int J Occup Med Environ Health*. 2011;24(4):359-66. Epub  
549 2011/11/17. doi: 10.2478/s13382-011-0046-7. PubMed PMID: 22086450.
- 550 61. Tavanaee Sani A, Hajian S, Maryam S. Evaluation of PPD test in Medical Student of Mashhad  
551 University Medical Sciences in 2011-2013. *Medical Journal of Mashhad University of Medical  
552 Sciences*. 2015;58(8):441-5.
- 553 62. Vaziri S, Khazaei S, Neishaboori S, Kanani M, Madani S. The degree of agreement of  
554 quantiferon TB gold test and tuberculin skin test in nurses. *Journal of Gorgan University of Medical  
555 Sciences*. 2011;13(1):37-43.
- 556 63. Agaya J, Nnadi CD, Odhiambo J, Obonyo C, Obiero V, Lipke V, et al. Tuberculosis and latent  
557 tuberculosis infection among healthcare workers in Kisumu, Kenya. 2015;20(12):1797-804.
- 558 64. Corbett EL, Marston B, Churchyard GJ, De Cock KM. Tuberculosis in sub-Saharan Africa:  
559 opportunities, challenges, and change in the era of antiretroviral treatment. *Lancet*.  
560 2006;367(9514):926-37. Epub 2006/03/21. doi: 10.1016/S0140-6736(06)68383-9. PubMed PMID:  
561 16546541.
- 562 65. Drobniowski F, Cooke M, Jordan J, Casali N, Mugwagwa T, Broda A, et al. Systematic review,  
563 meta-analysis and economic modelling of molecular diagnostic tests for antibiotic resistance in  
564 tuberculosis. *Health Technol Assess*. 2015;19(34):1-188, vii-viii. Epub 2015/05/09. doi:  
565 10.3310/hta19340. PubMed PMID: 25952553; PubMed Central PMCID: PMCPMC4781420.
- 566 66. Franco C, Zanetta DJTJoT, Disease L. Assessing occupational exposure as risk for tuberculous  
567 infection at a teaching hospital in Sao Paulo, Brazil. 2006;10(4):384-9.
- 568 67. Powell K, Han D, Hung N, Vu T, Sy D, Trinh T, et al. Prevalence and risk factors for  
569 tuberculosis infection among personnel in two hospitals in Viet Nam. 2011;15(12):1643-9.

570 68. Rutanga C, Lowrance DW, Oeltmann JE, Mutembayire G, Willis M, Uwizeye CB, et al. Latent  
571 tuberculosis infection and associated factors among Health Care Workers in Kigali, Rwanda.  
572 2015;10(4):e0124485.

573 69. Zhu S, Xia L, Yu S, Chen S, Zhang J. The burden and challenges of tuberculosis in China:  
574 findings from the Global Burden of Disease Study 2015. *Sci Rep.* 2017;7(1):14601. Epub 2017/11/04.  
575 doi: 10.1038/s41598-017-15024-1. PubMed PMID: 29097809; PubMed Central PMCID:  
576 PMC5668247.

577 70. van Rie A, Beyers N, Gie RP, Kunneke M, Zietsman L, Donald PR. Childhood tuberculosis in an  
578 urban population in South Africa: burden and risk factor. *Arch Dis Child.* 1999;80(5):433-7. Epub  
579 1999/04/20. doi: 10.1136/adc.80.5.433. PubMed PMID: 10208948; PubMed Central PMCID:  
580 PMC1717911.

581 71. Durando P, Sotgiu G, Spigno F, Piccinini M, Mazzarello G, Viscoli C, et al. Latent tuberculosis  
582 infection and associated risk factors among undergraduate healthcare students in Italy: a cross-  
583 sectional study. 2013;13(1):443.

584 72. Storla DG, Yimer S, Bjune GA. A systematic review of delay in the diagnosis and treatment of  
585 tuberculosis. *BMC Public Health.* 2008;8(1):15. Epub 2008/01/16. doi: 10.1186/1471-2458-8-15.  
586 PubMed PMID: 18194573; PubMed Central PMCID: PMC2265684.

587 73. Prasad R, Singh A, Balasubramanian V, Gupta N. Extensively drug-resistant tuberculosis in  
588 India: Current evidence on diagnosis & management. *Indian J Med Res.* 2017;145(3):271-93. Epub  
589 2017/07/28. doi: 10.4103/ijmr.IJMR\_177\_16. PubMed PMID: 28749390; PubMed Central PMCID:  
590 PMC5555056.

591 74. Nasreen S, Shokoohi M, Malvankar-Mehta MSJ. Prevalence of latent tuberculosis among  
592 health care workers in high burden countries: a systematic review and meta-analysis.  
593 2016;11(10):e0164034.

594 75. Apriani L, McAllister S, Sharples K, Alisjahbana B, Ruslami R, Hill PC, et al. Latent tuberculosis  
595 infection in health care workers in low and middle-income countries: an updated systematic review.  
596 2019:1801789.

597 76. Karadakhly K, Othman N, Ibrahim F, Saeed AA, Amin AAH. Tuberculosis in Sulaimaniyah,  
598 Iraqi Kurdistan: A Detailed Analysis of Cases Registered in Treatment Centers. *Tanaffos.*  
599 2016;15(4):197-204. Epub 2016/01/01. PubMed PMID: 28469675; PubMed Central PMCID:  
600 PMC5410115.

601 77. Hassan DN, Hanna AJ. Tuberculosis and sudden death in Baghdad. *Am J Forensic Med Pathol.*  
602 1984;5(2):169-74. Epub 1984/06/01. PubMed PMID: 6731410.

603 78. Sargazi A, Sepehri Z, Sagazi A, Jim PN, Kiani ZJ. Eastern Mediterranean region  
604 tuberculosis economic burden in 2014. 2015;4(1):P102.

605 79. Sahebi L, Ansarin K, Maryam S, Monfaredan A, Sabbgh Jadid H. The factors associated with  
606 tuberculosis recurrence in the northwest and west of Iran. *Malays J Med Sci.* 2014;21(6):27-35. Epub  
607 2015/04/22. PubMed PMID: 25897280; PubMed Central PMCID: PMC4391452.

608 80. Jimma W, Ghazisaeedi M, Shahmoradi L, Abdurahman AA, Kalhori SRN, Nasehi M, et al.  
609 Prevalence of and risk factors for multidrug-resistant tuberculosis in Iran and its neighboring  
610 countries: systematic review and meta-analysis. *Rev Soc Bras Med Trop.* 2017;50(3):287-95. Epub  
611 2017/07/13. doi: 10.1590/0037-8682-0002-2017. PubMed PMID: 28700044.

612 81. Rezai MS, Abedi S, Afshari M, Moosazadeh MJ. Perspectives on estimating tuberculin skin  
613 test reactions among children and teenagers who received the bacillus Calmette-Guérin vaccination  
614 at birth: A meta-analysis. 2017;8(1):3.

615 82. Goscé L, Bitencourt J, Gupta R, Arruda S, Rodrigues L, Abubakar IJ. BCG vaccination  
616 following latent TB treatment: Possible implications for different settings. 2019;80:S17-S9.

617 83. Al-Orainey IO. Diagnosis of latent tuberculosis: Can we do better? 2009;4(1):5.

618

620 **11. Supporting information**

621 **S1 File.** PRISMA Checklist

622 **S2 File.** The review protocol which has been registered in PROSPERO International  
623 Prospective Register of Systematic Reviews

624 **S3 File.** Newcastle-Ottawa scale checklist

625 **S1 Table.** Data characteristics (Full details) (MS Excel)

626 **S1 Fig.** The prevalence subgroup analysis (Forest plot - Random effect model) of TST/PPD  
627 induration diameter (48 hrs.) in HCWs with LTBI.

628 **S2 Fig.** The prevalence subgroup analysis (Forest plot - Random effect model) of TST/PPD  
629 induration diameter (48 hrs.) in HCWs with LTBI base on geographical region.

630 **S3 Fig.** Cumulative meta-analysis for overall prevalence of LTBI in HCWs.

631 **S4 Fig.** The prevalence subgroup analysis to employment duration (Forest plot - Random  
632 effect model) base on PPD (A), and QFT (B) in HCWs with LTBI.

633 **S5 Fig.** The prevalence subgroup analysis of gender (Forest plot - Random effect model)  
634 base on PPD (A), and QFT (B) in HCWs with LTBI.

635 **S6 Fig.** The prevalence subgroup analysis of age (Forest plot - Random effect model) base  
636 on PPD (A), and QFT (B) in HCWs with LTBI.

637 **S7 Fig.** The prevalence subgroup analysis of history TB contact (Forest plot - Random effect  
638 model) base on PPD (A), and QFT (B) in HCWs with LTBI.

639 **S8 Fig.** The prevalence subgroup analysis of TB clinical symptoms (Forest plot - Random  
640 effect model) base on PPD (A), and QFT (B) in HCWs with LTBI.

641 **S9 Fig.** The prevalence subgroup analysis of BCG (Forest plot - Random effect model) base  
642 on PPD (A), and QFT (B) in HCWs with LTBI.

643 **S10 Fig.** Publication bias of studies included due to the aim of prevalence of HCWs with  
644 LTBI.

645 **12. Appendix: PubMed search strategy:**

646 ((Latent Tuberculosis) AND Iran AND Prevalence AND ((Health Personnel) OR (Healthcare

647 Worker) OR (Health Care Provider))

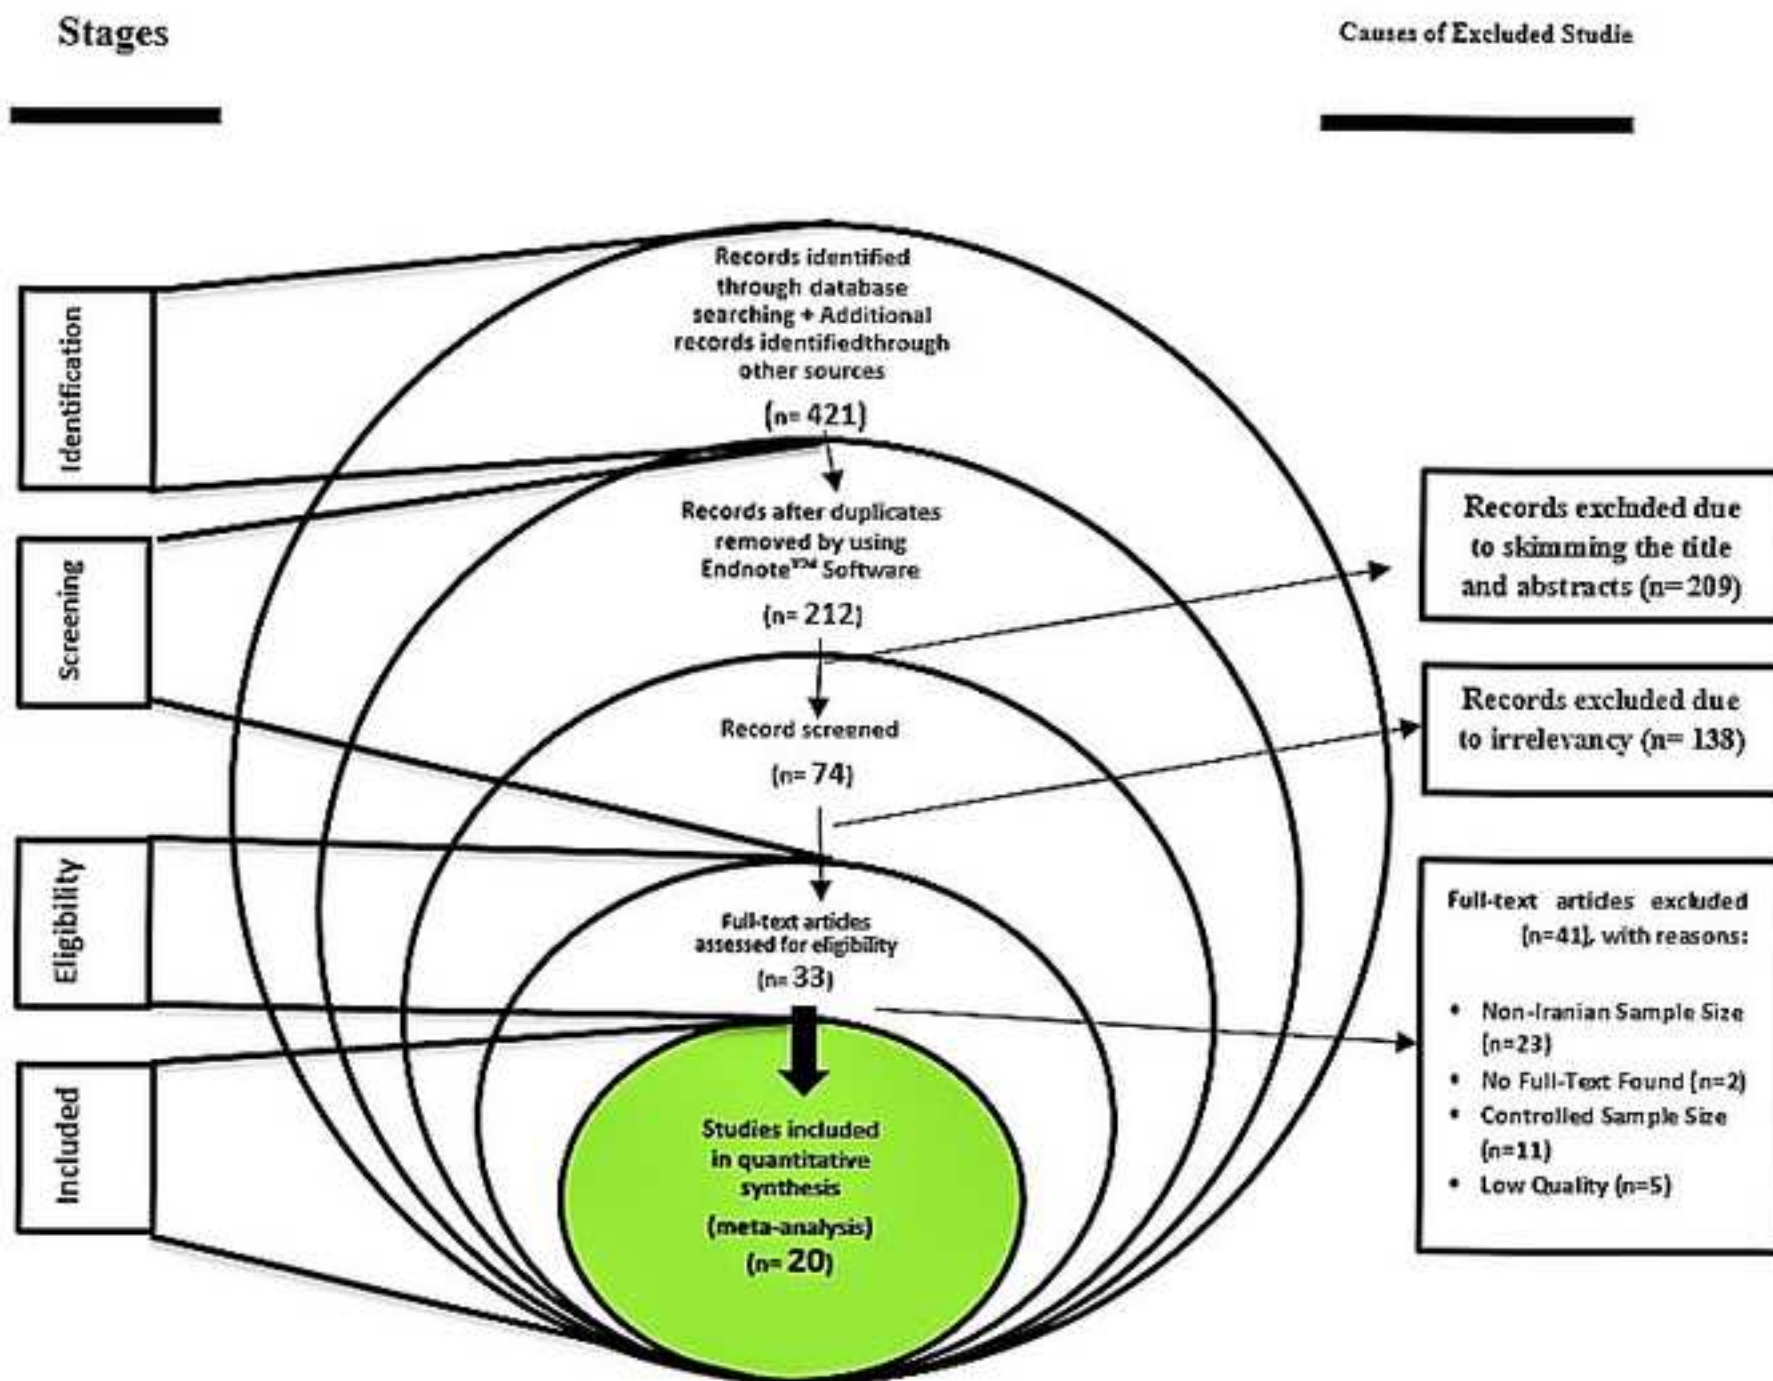

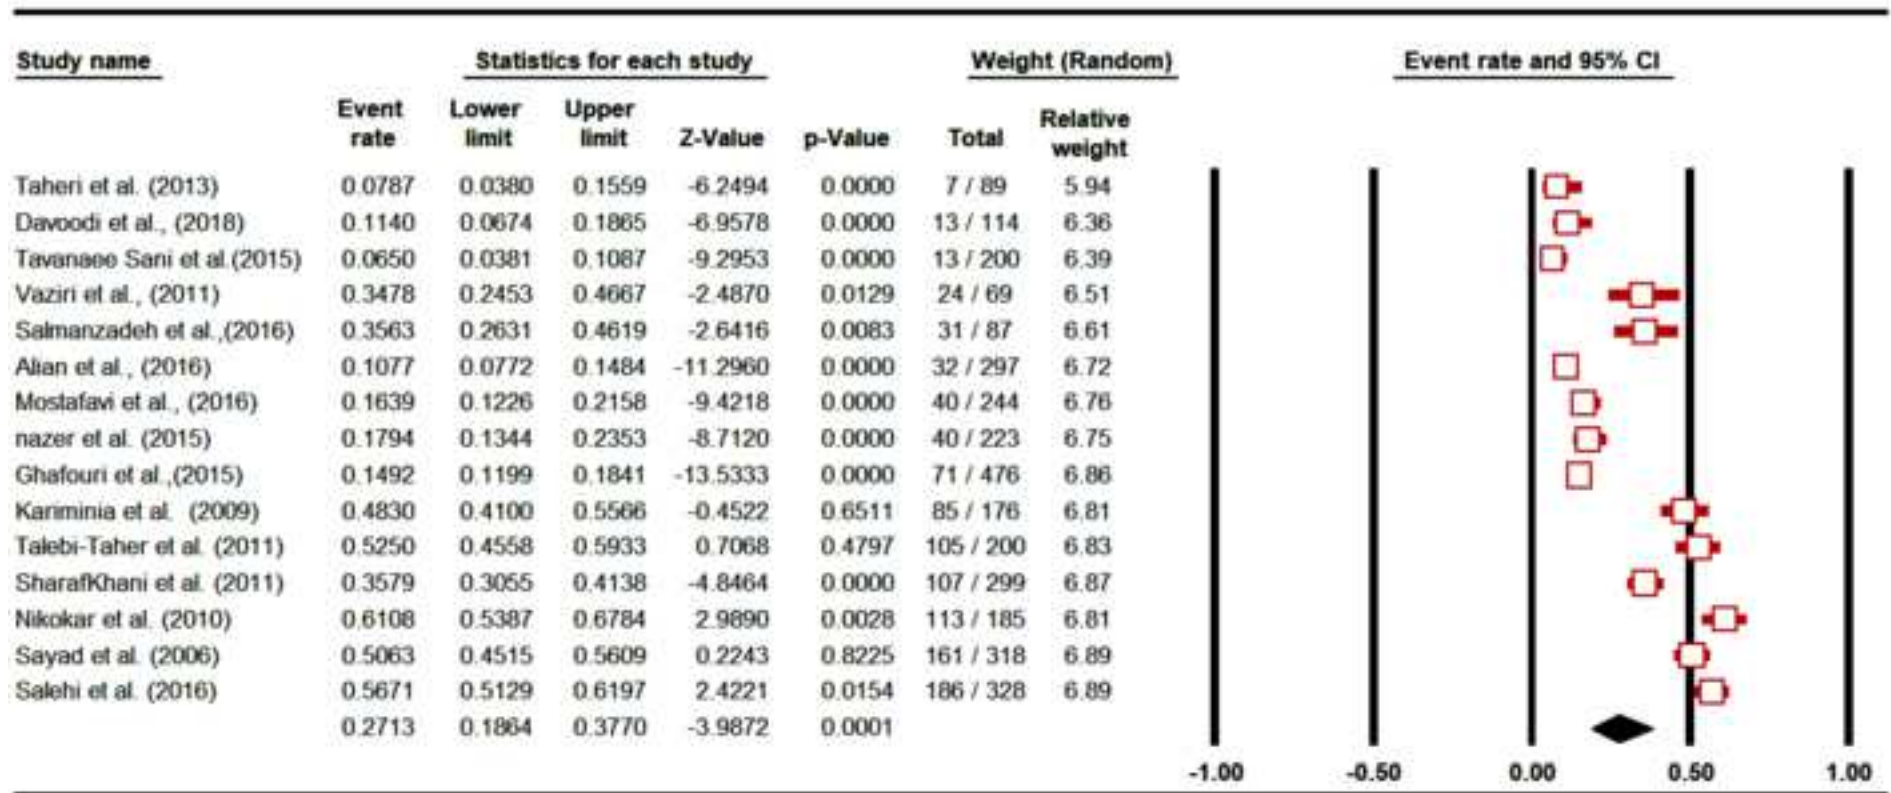

## Meta Analysis

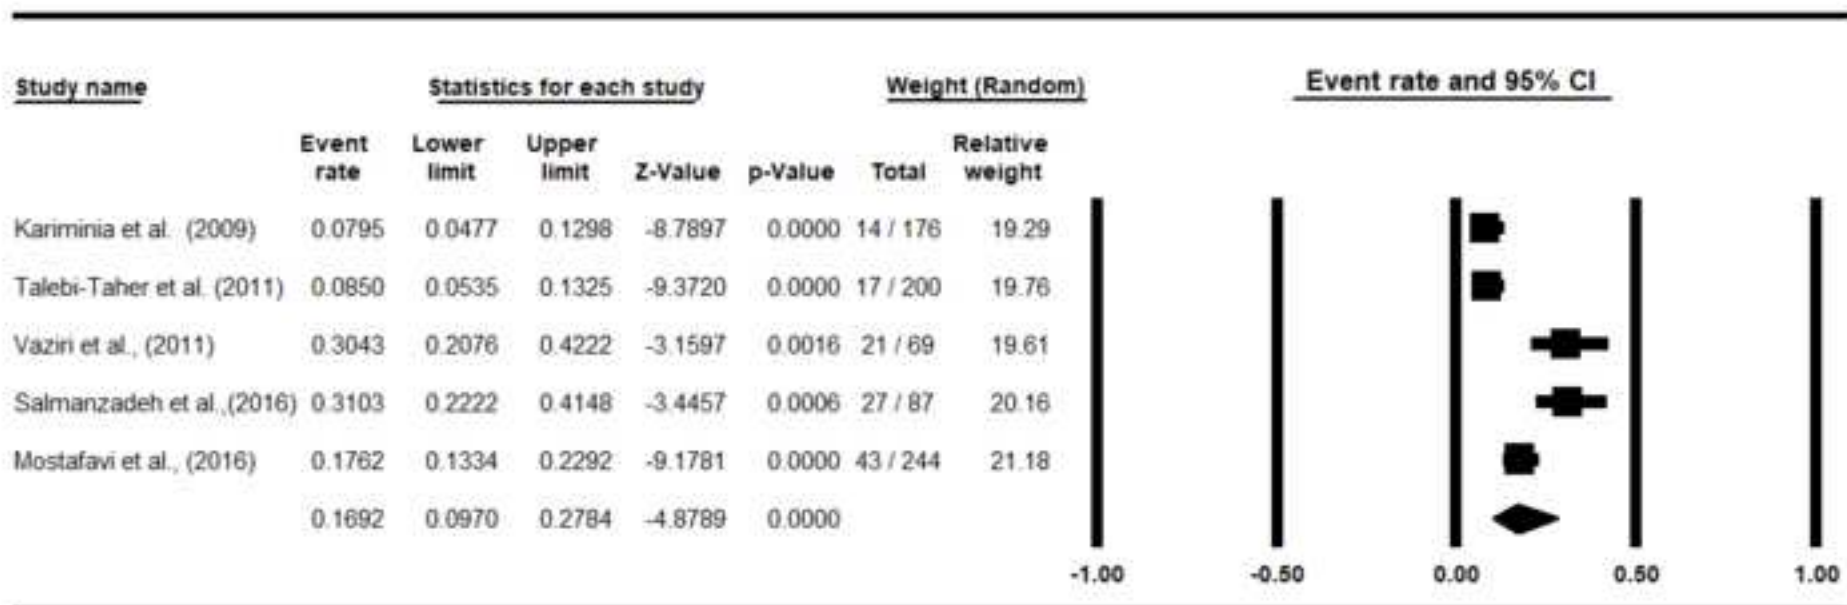

## Meta Analysis



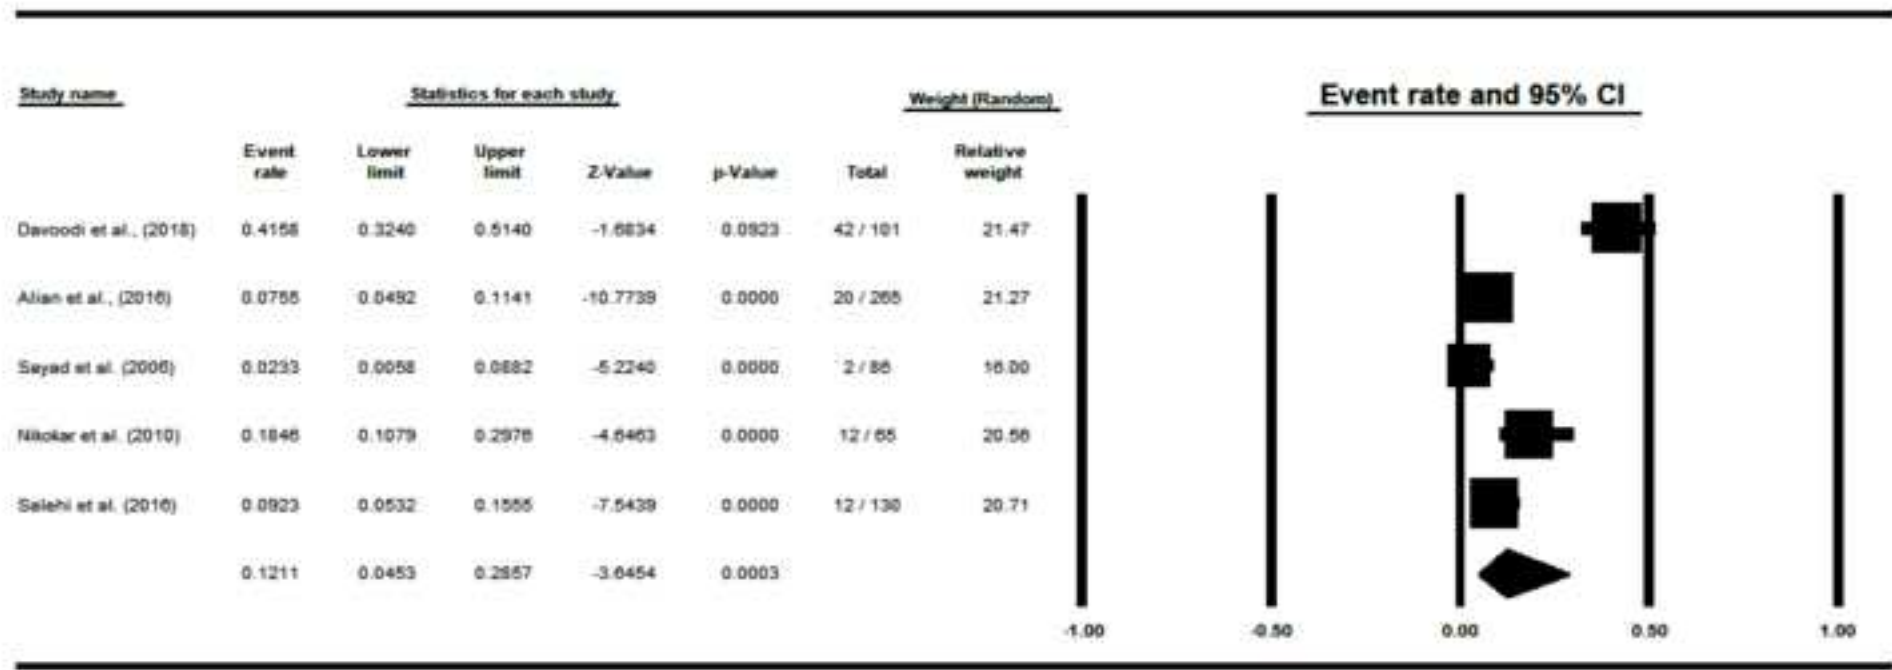

## Meta Analysis

Figure 5

[Click here to access/download;Figure;Fig 5.tif](#)

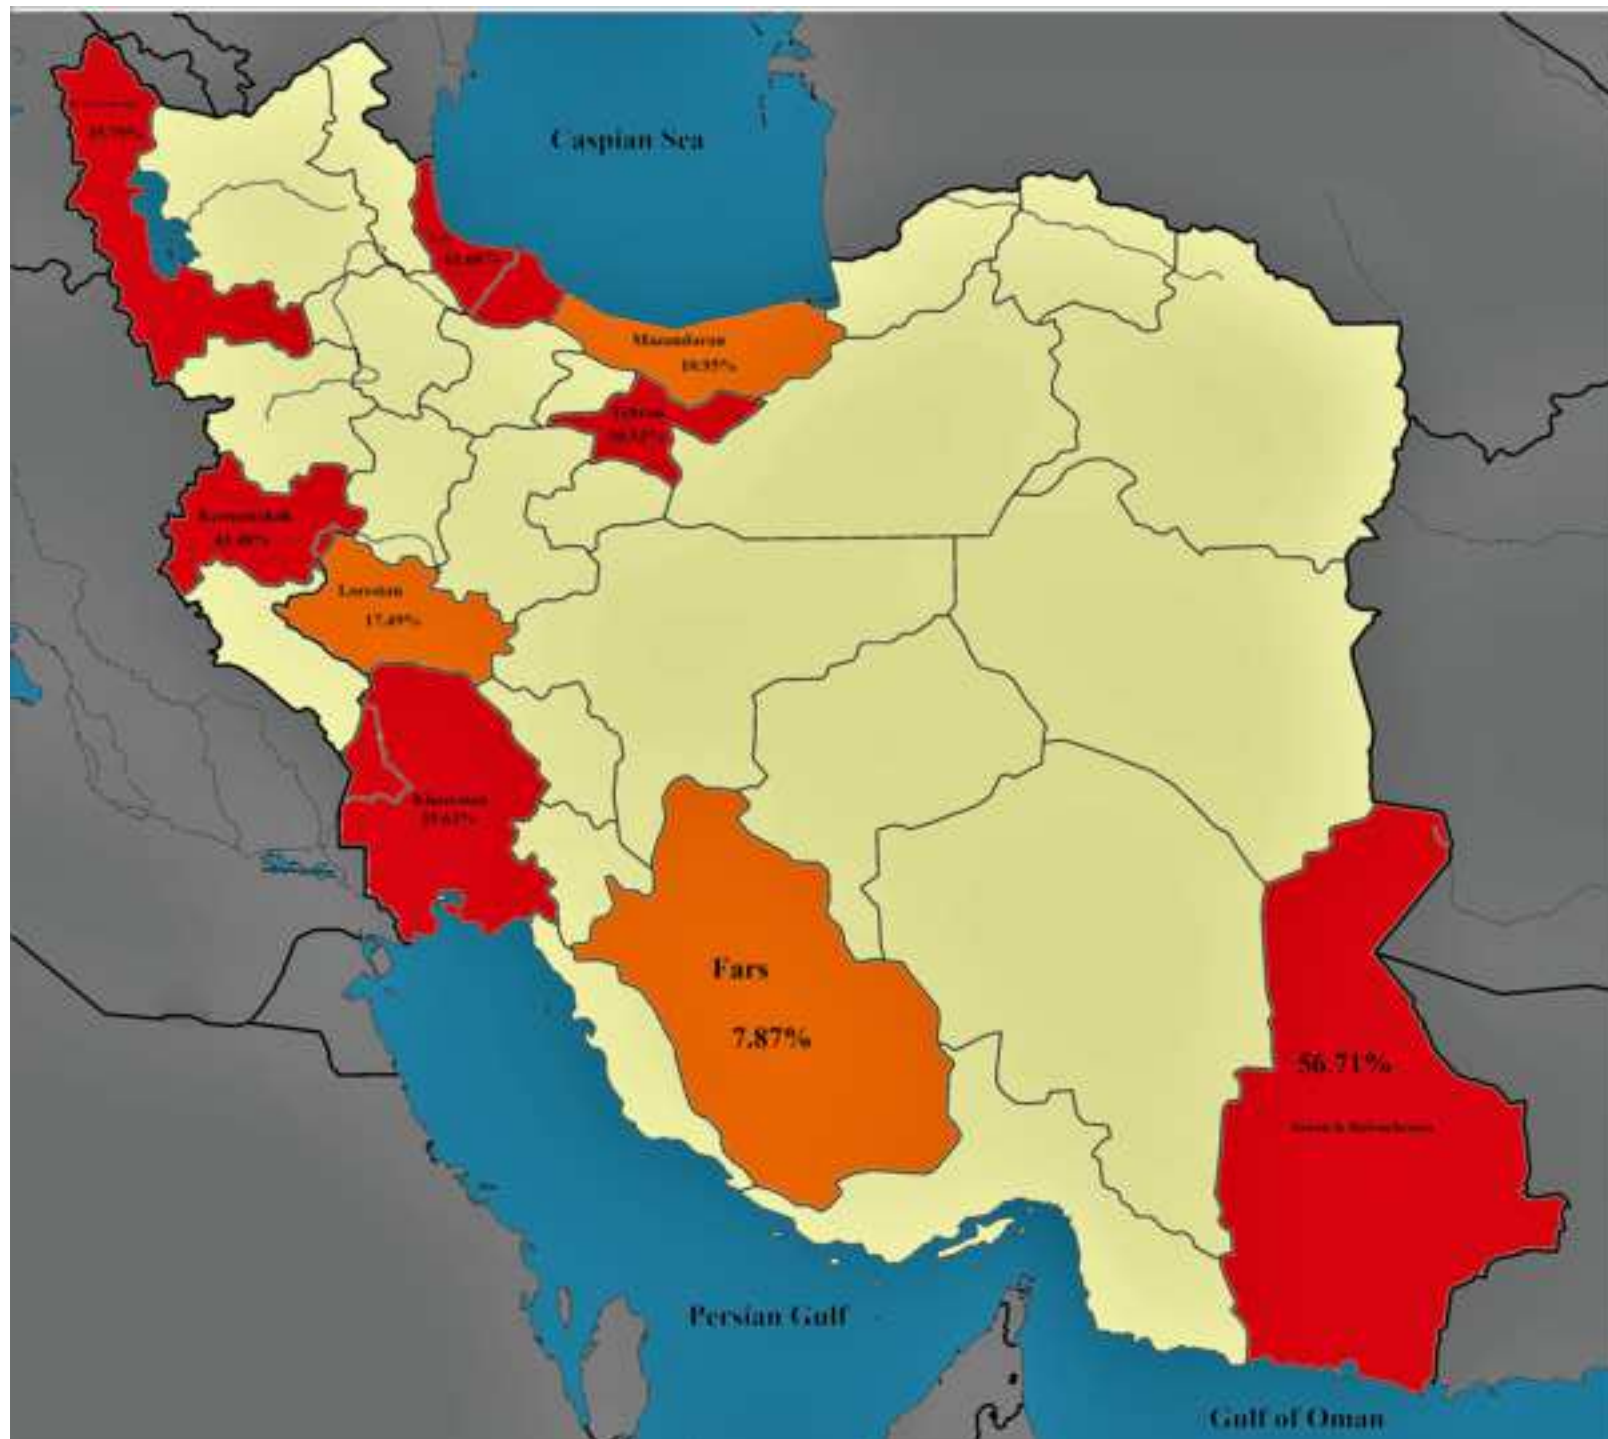

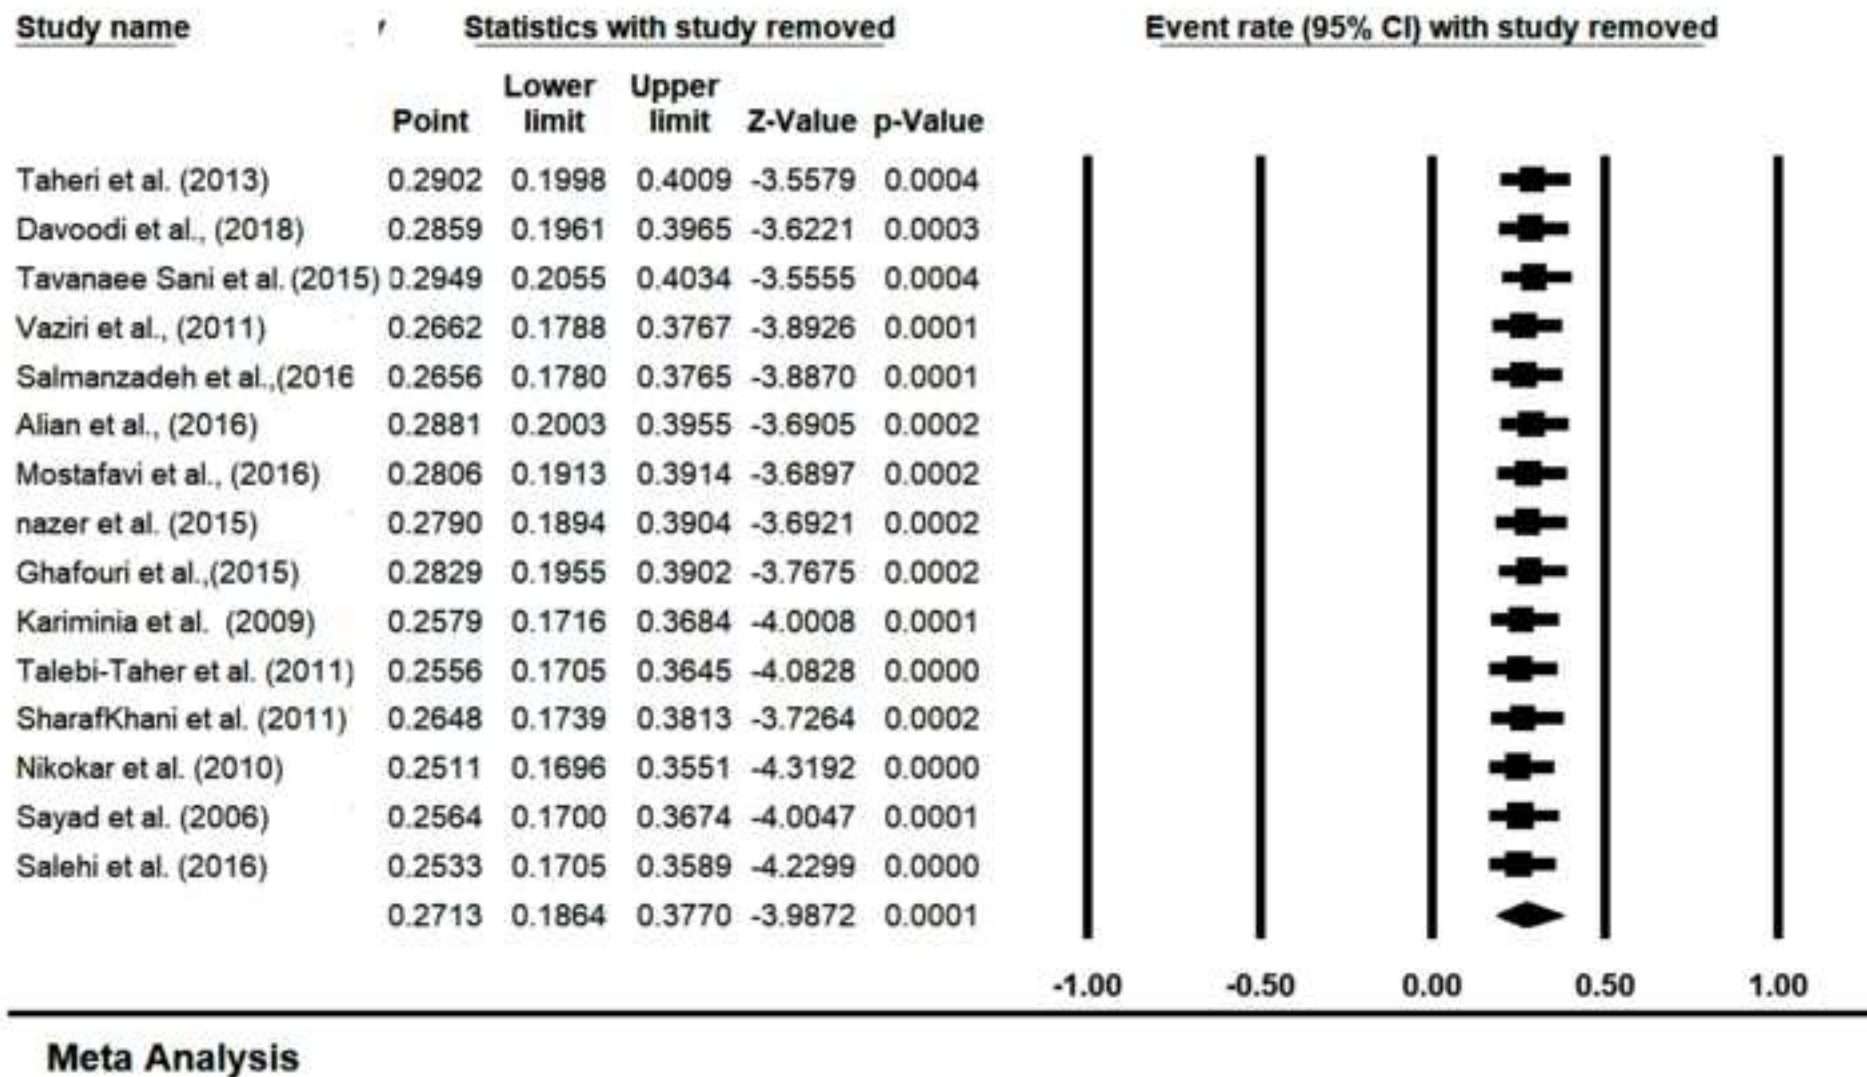

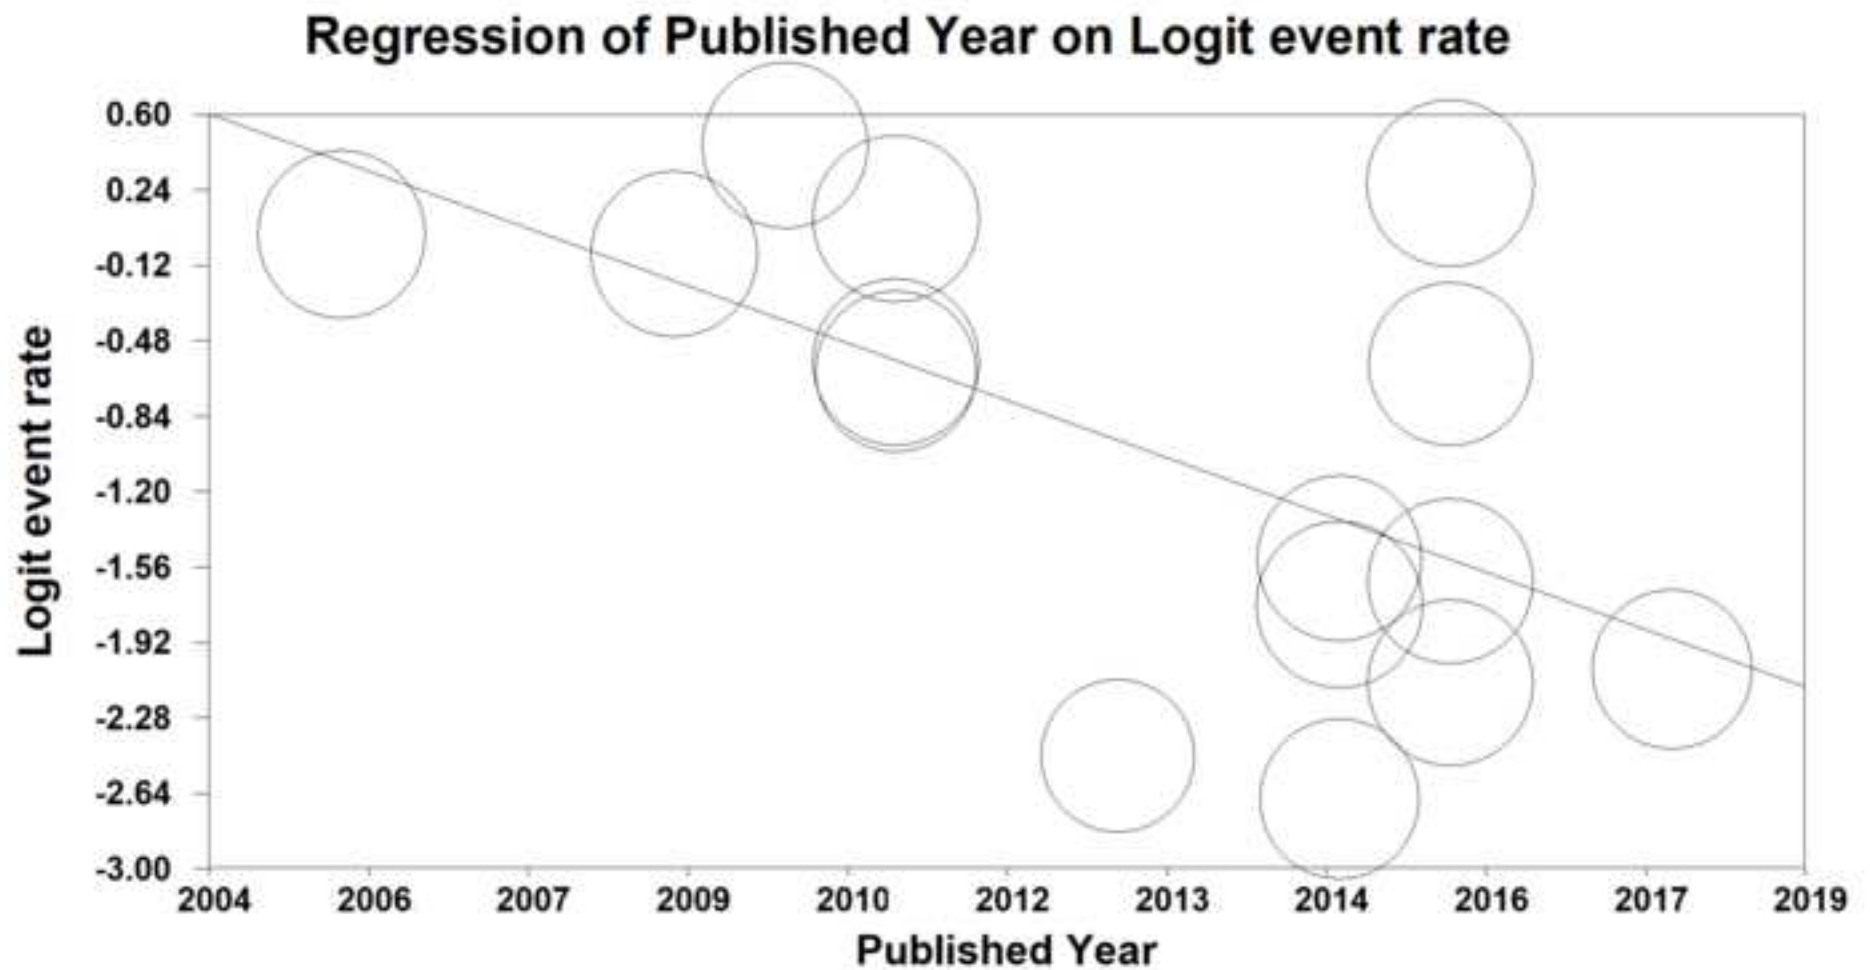

(Mixed effects regression (Method of moments); Slope =  $-0.1898$ (SE =  $0.068$ , (95% CI:  $-0.323$ –  $-0.056$ )), Intercept =  $381.14$ (SE =  $137.43$ , (95% CI:  $111.78$ – $650.5$ )), P =  $0.10653$ )

**(A)**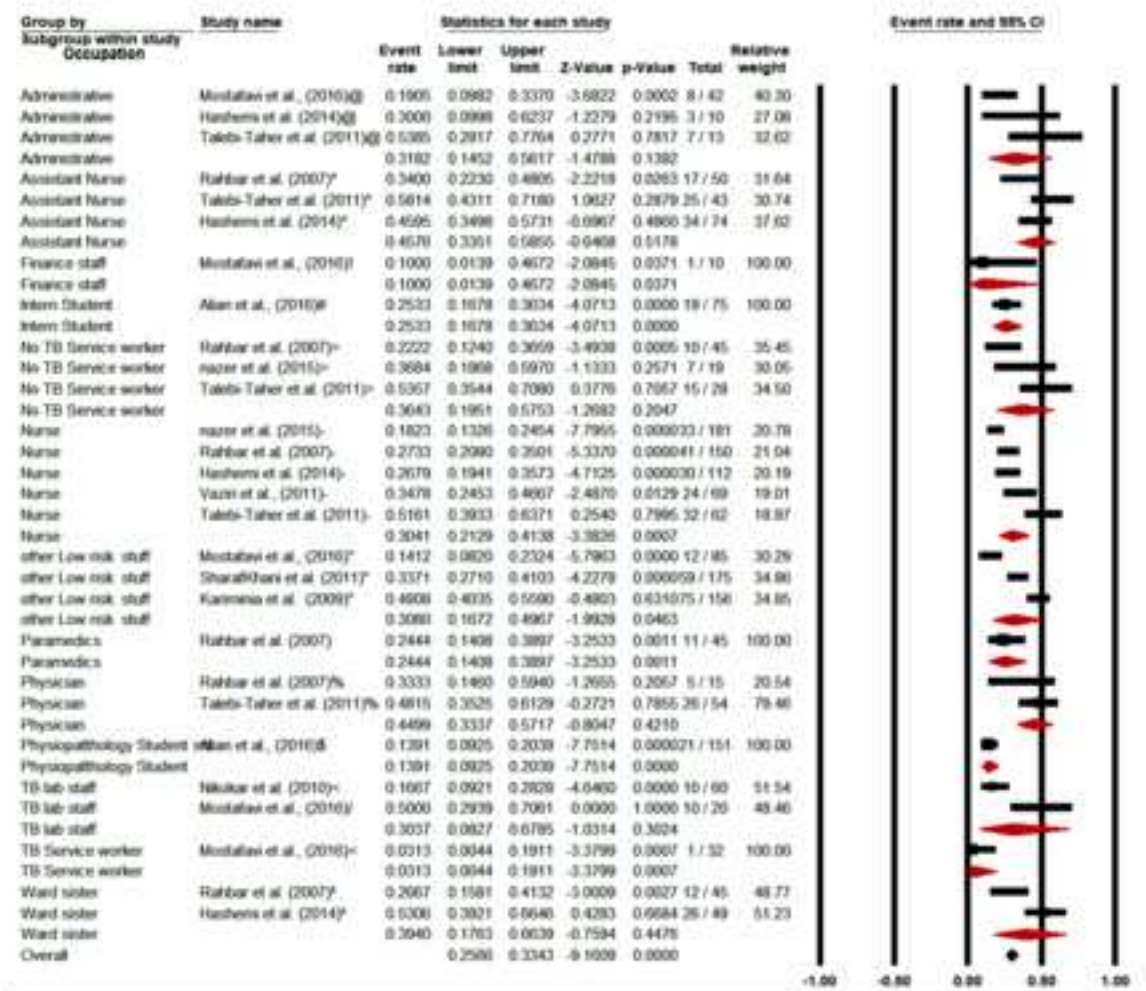**(B)**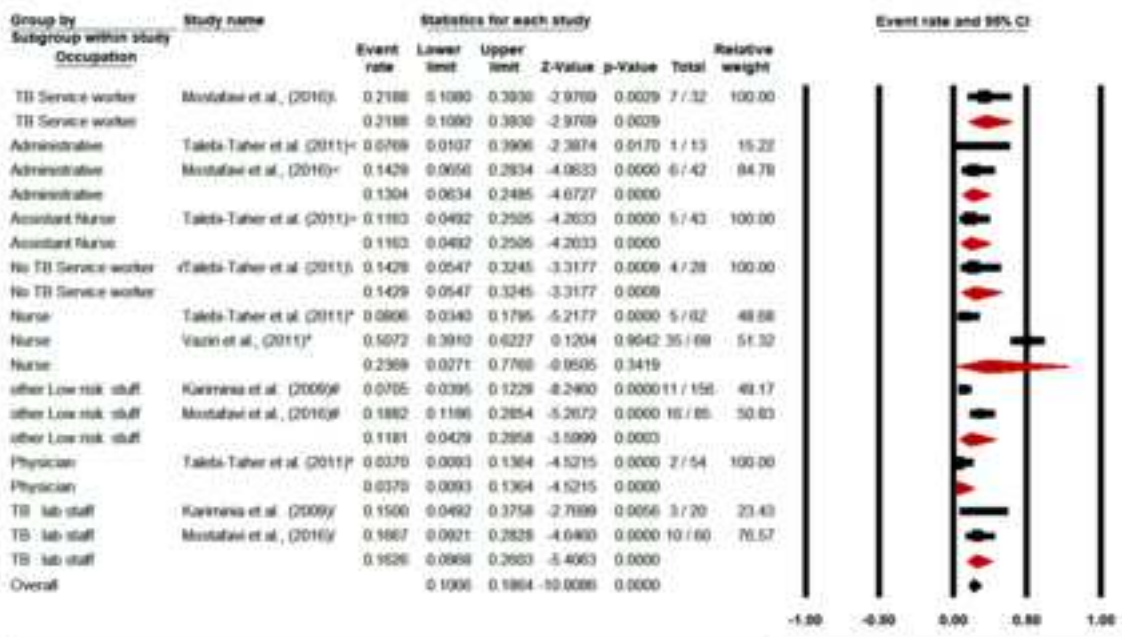

**(A)**

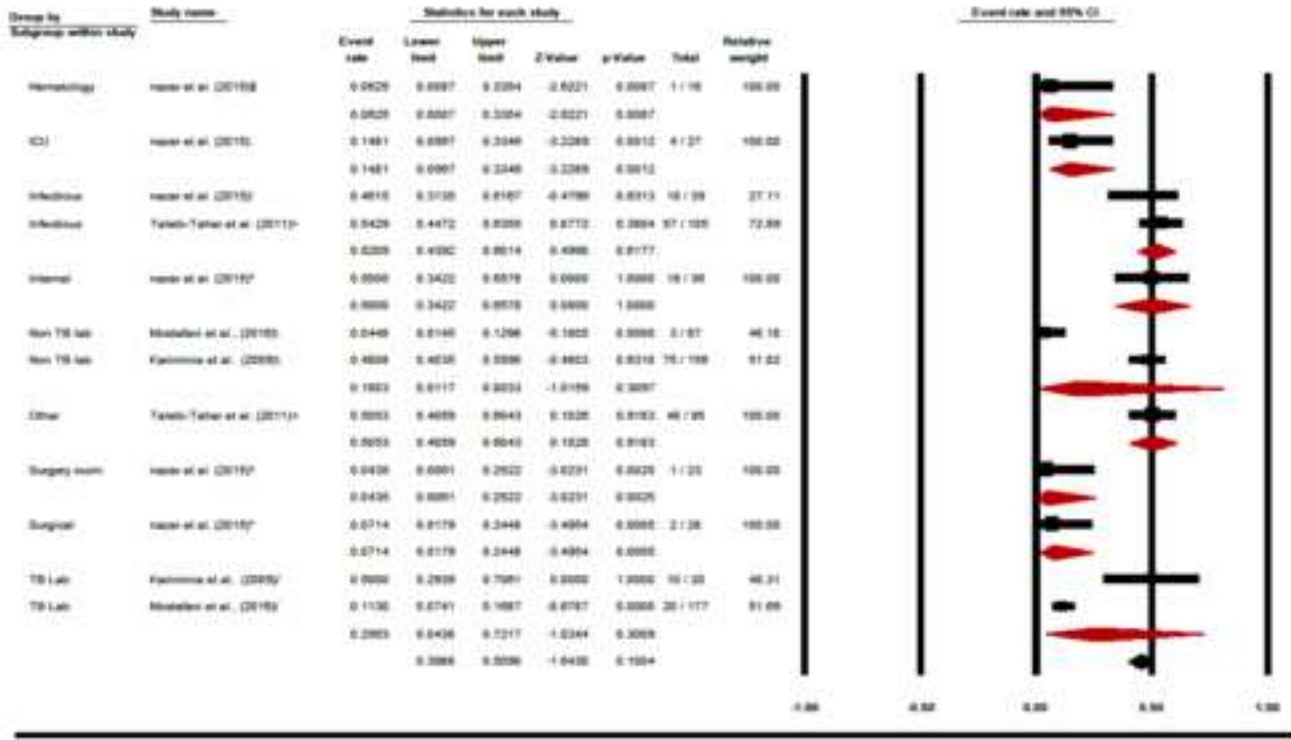

**(B)**

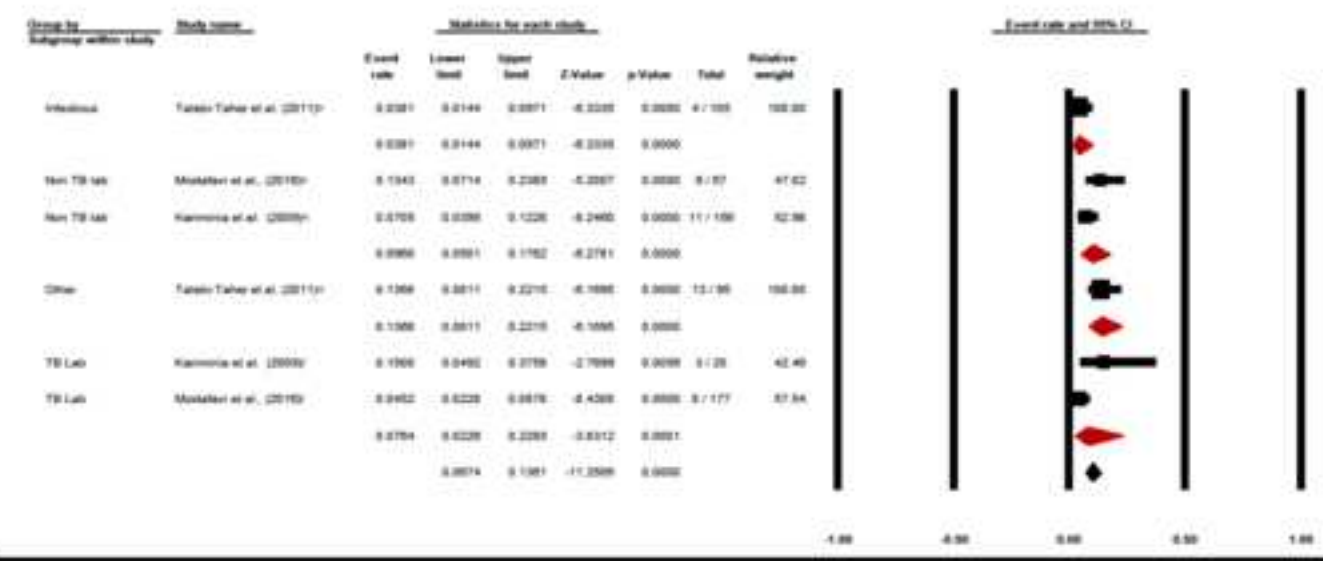

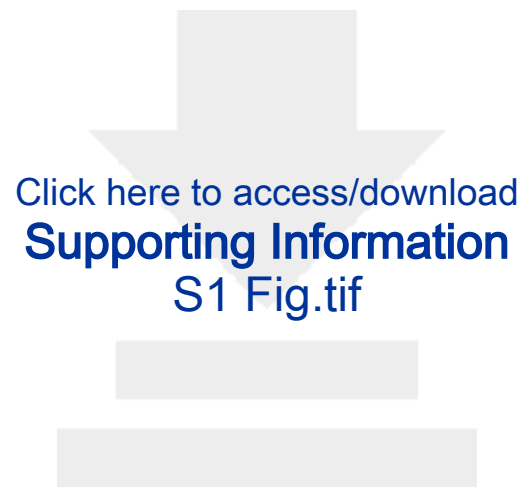

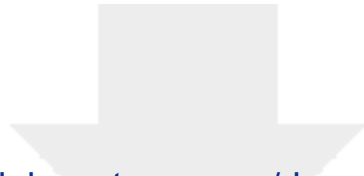

Click here to access/download  
**Supporting Information**  
renamed\_66a0a.DOC

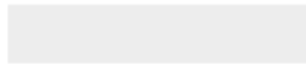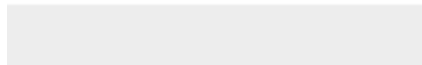



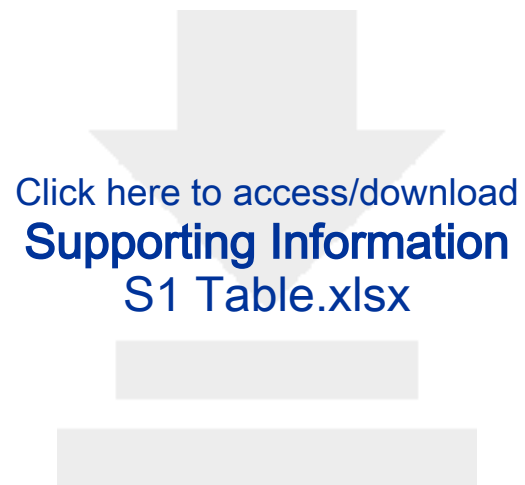

Click here to access/download  
**Supporting Information**  
S1 Table.xlsx

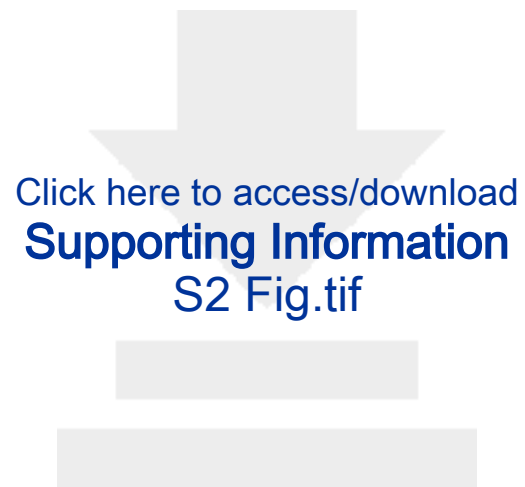

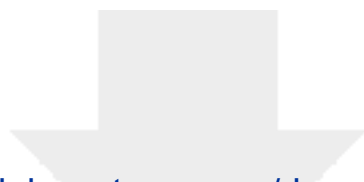

Click here to access/download  
**Supporting Information**  
renamed\_b43ee.pdf

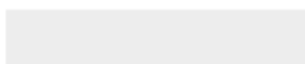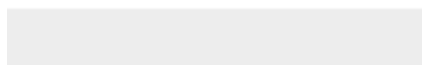

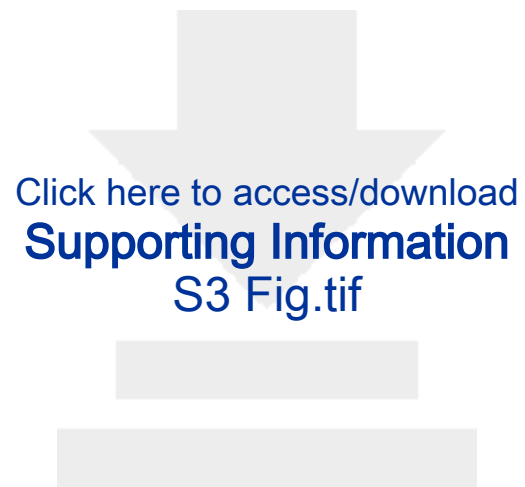

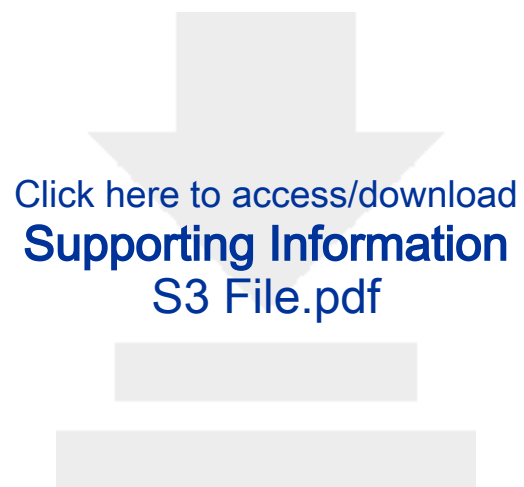

Click here to access/download  
**Supporting Information**  
S3 File.pdf

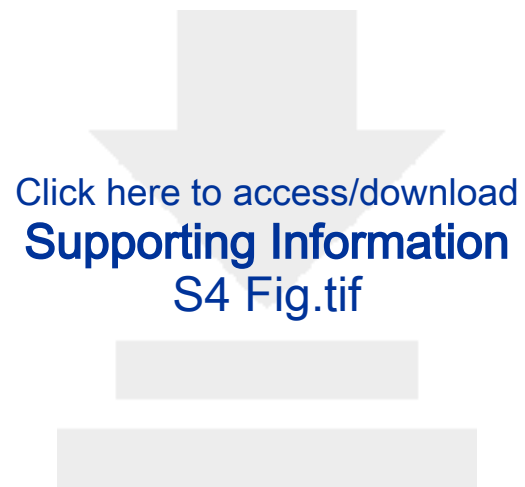

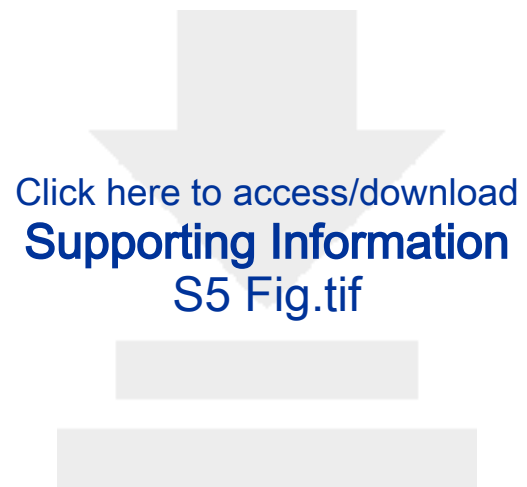

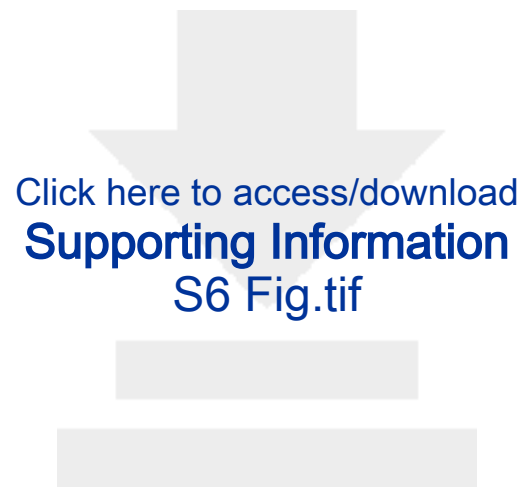



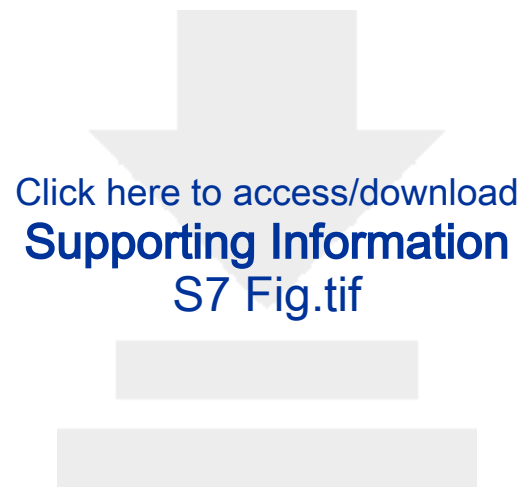

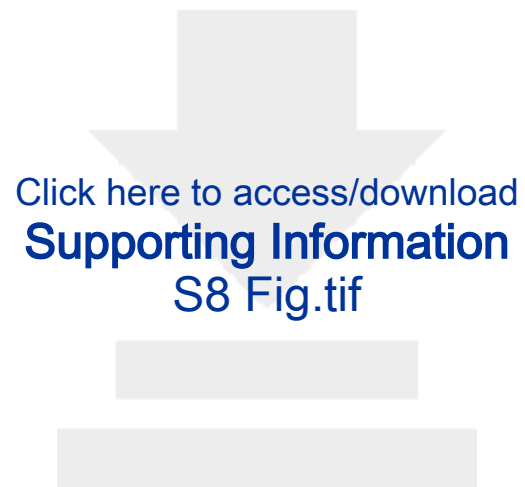

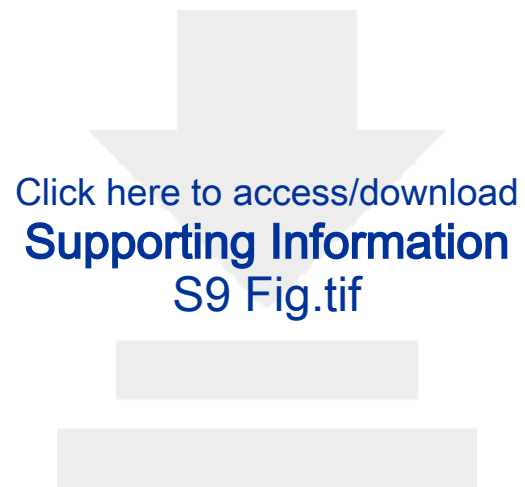



Click here to access/download  
**Supporting Information**  
S10 Fig.tif



Supplement: pone.0223335.s016.pdf [file pone.0223335.s016.pdf]
